# Supplementary material for: Evaluating Yield, Nutritional Quality, and Environmental Impact of Quinoa Straws across Mediterranean Water Environments
Source: MDPI journal article supplement (doi:10.3390/plants13060751), 2024-03-07
Supplement: s1 [file s1]

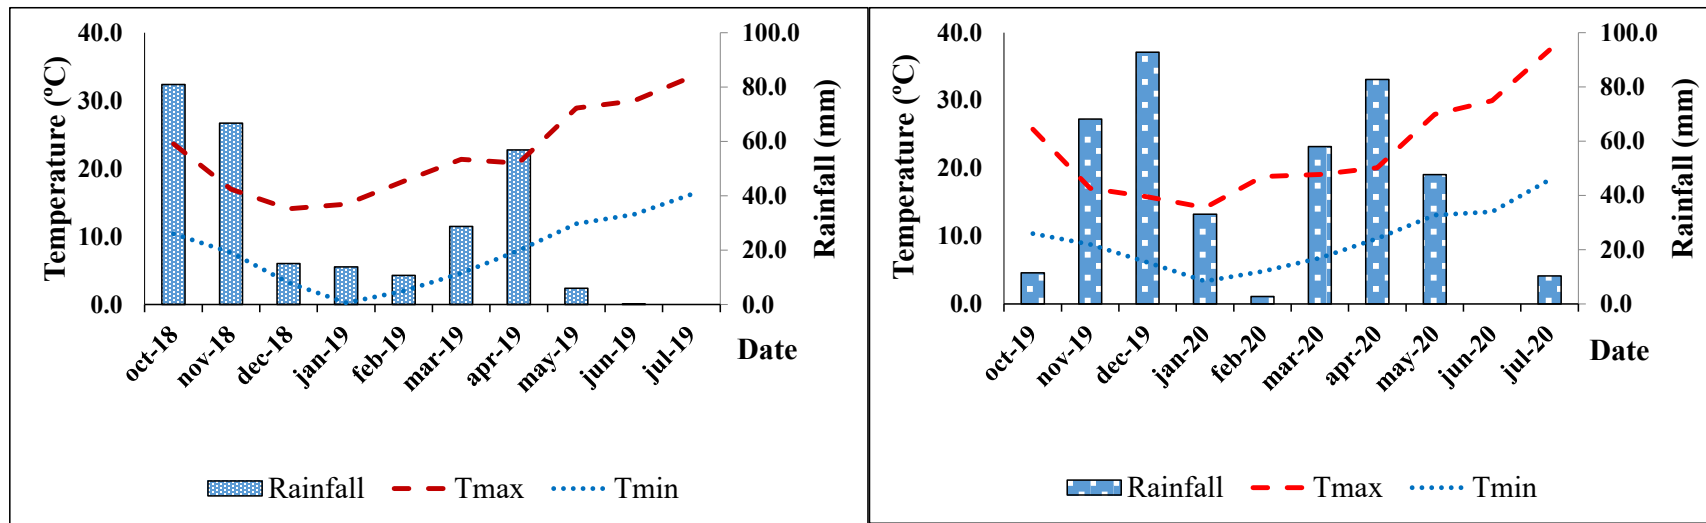

a)

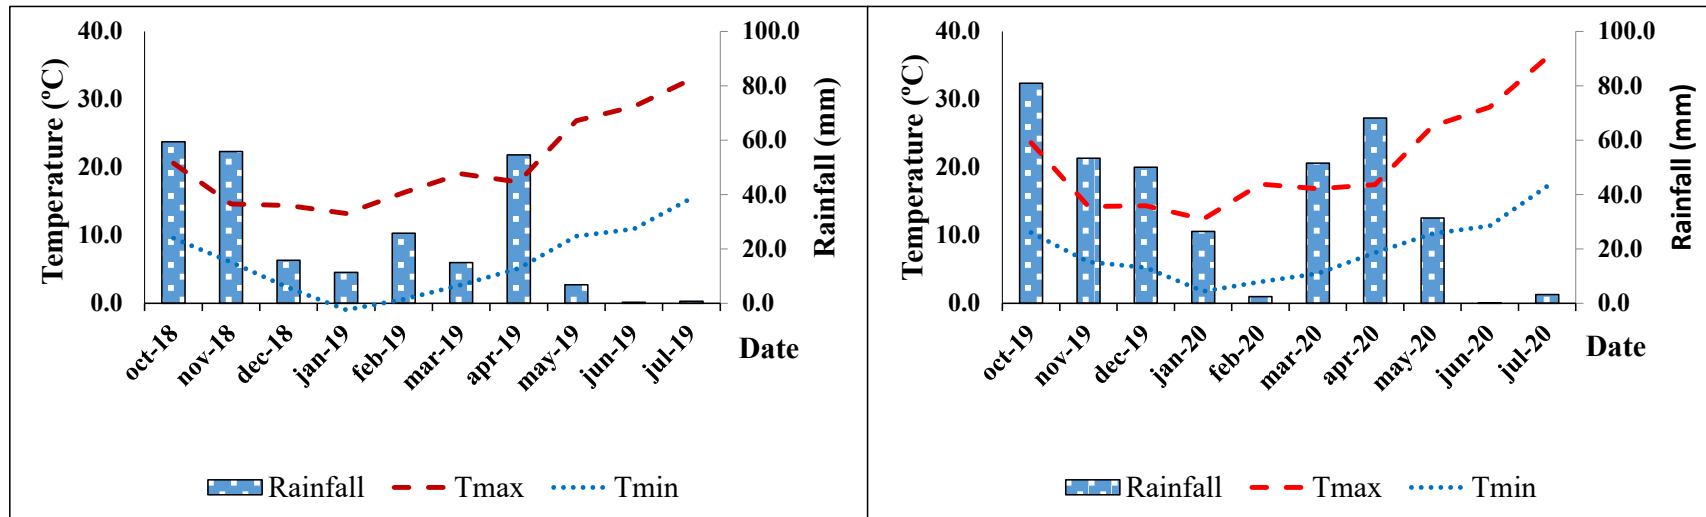

b)

**Supplementary Figure S1. Monthly rainfall and maximum (Tmax) and minimum (Tmin) mean temperature registered at a) La Orden farm and b) Maguilla during the 2019 (left) and 2020 (right) seasons**

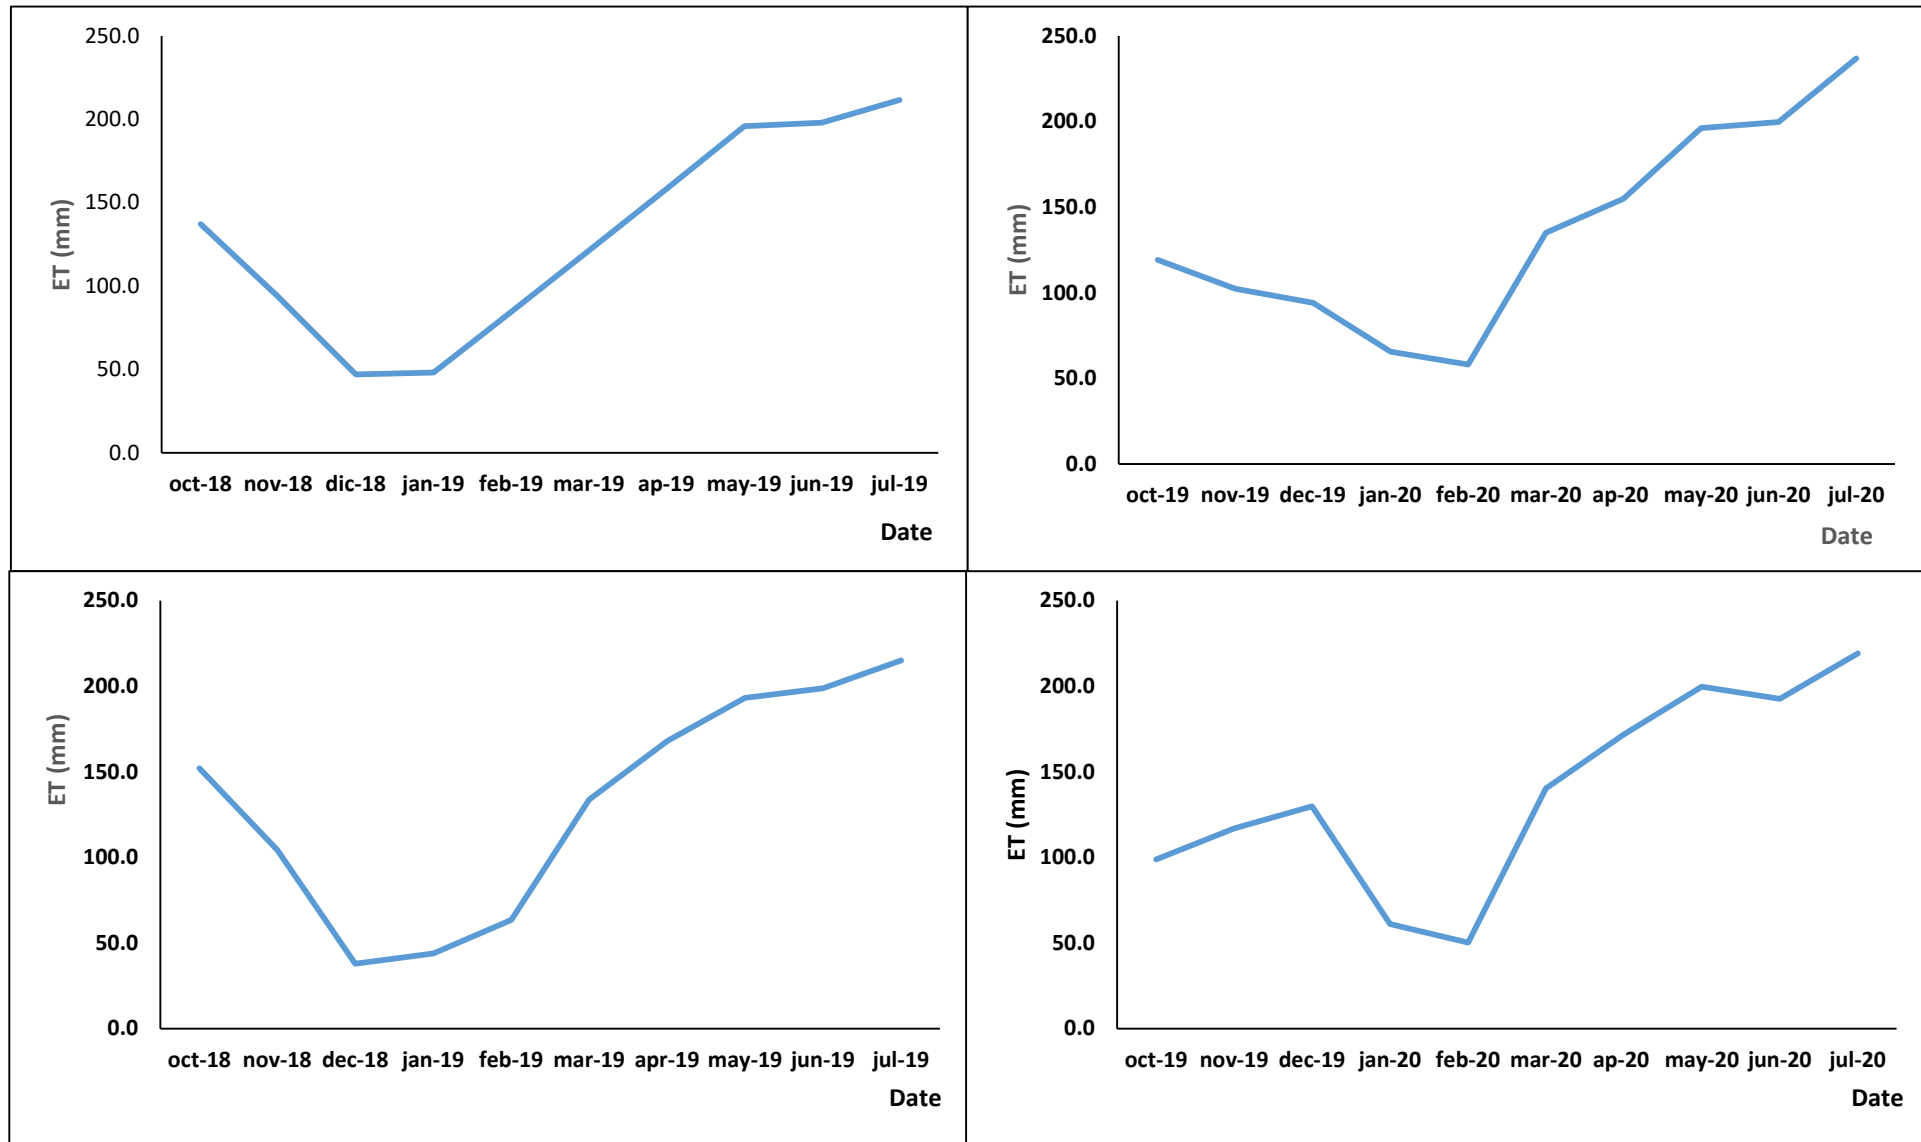

**Supplementary Figure S2. Monthly evapotranspiration (ET) at a) La Orden farm and b) Maguilla during the 2019 (left) and 2020 (right) experiments.** ET values were calculated using the following information: La Orden (Field capacity: 17.1% w/w; Wilting point: 7.9% w/w; Bulk density: 1.61 t/m<sup>3</sup>; Depth >1 m) and Maguilla (Field capacity: 37.0% w/w; Wilting point: 24.6% w/w; Bulk density: 1.45 t/m<sup>3</sup>; Depth >1 m).

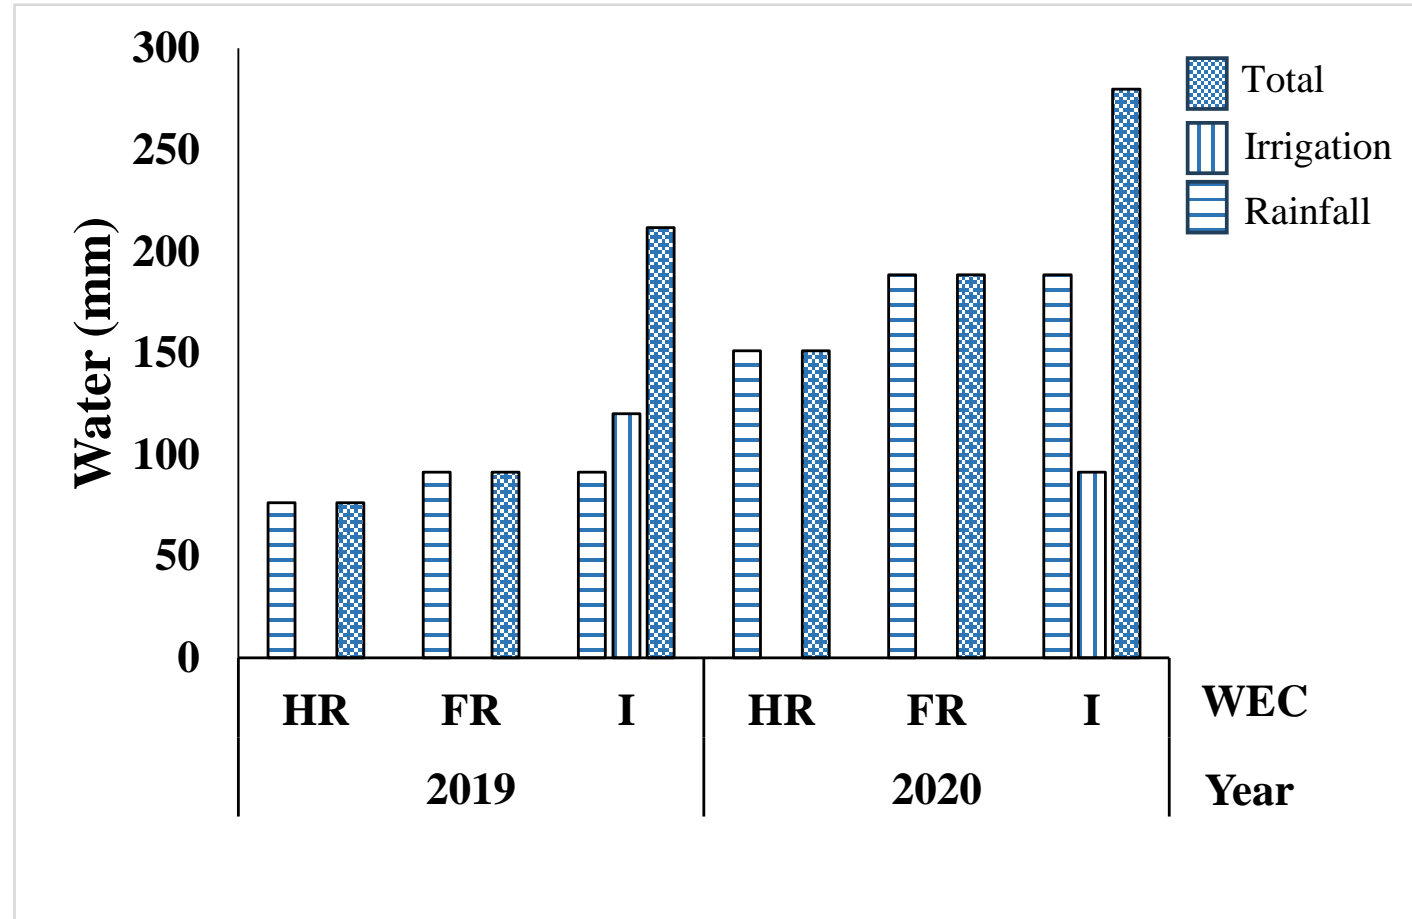

**Supplementary Figure S3. Water input in each water environmental condition (WEC).** Under rainfed conditions (HR or FR), the water input was due to precipitations, and under irrigated conditions (I), the water input was the sum of the water due to precipitations and irrigation. Precipitations (rainfall) in the graph correspond those in record from March to June (growing season in La Orden farm (FR and I) and Maguilla (HR) during the 2019 and 2020 seasons.

**Table S1.** Straw yield (kg ha<sup>-1</sup>) and harvest index (HI) of three quinoa varieties (V) grown under three water environmental conditions (WEC) during two consecutive years (Y) according to treatments interactions.

| Interaction    | Straw yield<br>(kg ha <sup>-1</sup> ) | HI     |
|----------------|---------------------------------------|--------|
| <b>Y x WEC</b> |                                       |        |
| 2019 x I       | 2805 ab                               | 0.43 a |
| 2019 x FR      | 1188 d                                | 0.44 a |
| 2019 x HR      | 2094 bc                               | 0.28 b |
| 2020 x I       | 2555 abc                              | 0.44 a |
| 2020 x FR      | 3050 a                                | 0.42 a |
| 2020 x HR      | 1762 cd                               | 0.41 a |
| <b>Y x V</b>   |                                       |        |
| 2019 x P       | 2468 a                                | 0.35   |
| 2019 x M       | 2214 a                                | 0.37   |
| 2019 x T       | 1405 b                                | 0.44   |
| 2020 x P       | 2487 a                                | 0.42   |
| 2020 x M       | 2459 a                                | 0.43   |
| 2020 x T       | 2420 a                                | 0.42   |
| <b>WEC x V</b> |                                       |        |
| I x P          | 3096 a                                | 0.42   |
| I x M          | 2770 ab                               | 0.43   |
| I x T          | 2175 abc                              | 0.45   |
| FR x P         | 2193 abc                              | 0.43   |
| FR x M         | 2176 abc                              | 0.42   |
| FR x T         | 1987 bc                               | 0.45   |
| HR x P         | 2144 bc                               | 0.32   |
| HR x M         | 2064 bc                               | 0.34   |
| HR x T         | 1576 c                                | 0.39   |

Different lowercase letters within the same column indicate significant differences at  $p < 0.05$  according to Tukey's test. n.s.: not significant; significant at \* $p < 0.05$ ; \*\* $p < 0.01$  and \*\*\*  $p < 0.001$ . I: irrigated. FR: fresh rainfed. HR hard rainfed; P: Pasto. M: Marisma. T: Titicaca

**Table S2.** Content of ash, protein, minerals and fibre, and relative feed value (RFV) of the straw of three quinoa varieties (Pasto, Marisma, and Titicaca) grown under three environmental conditions (I, FR and HR) during two consecutive years (2019, 2020).

| Treatment      | Ash<br>(%) | CP<br>(%) | CF<br>(%) | P<br>(%) | K<br>(%) | Ca<br>(%) | Mg<br>(%) | GF<br>(%) | NDF<br>(%) | ADF<br>(%) | ADL<br>(%) | Hem.<br>(%) | Cell.<br>(%) | RFV      |
|----------------|------------|-----------|-----------|----------|----------|-----------|-----------|-----------|------------|------------|------------|-------------|--------------|----------|
| <b>Y x WEC</b> |            |           |           |          |          |           |           |           |            |            |            |             |              |          |
| 2019 x I       | 13.9       | 15.9 a    | 1.75      | 0.36 a   | 5.74 ab  | 2.24 ab   | 1.21 a    | 20.6      | 34.2 c     | 23.5       | 4.7        | 10.7        | 18.8 c       | 195.2 a  |
| 2019 x FR      | 14.9       | 14.2 a    | 2.11      | 0.22 b   | 6.12 ab  | 2.74 a    | 1.14 a    | 21.4      | 32.3 c     | 21.7       | 3.9        | 10.6        | 17.7 c       | 216.4 a  |
| 2019 x HR      | 19.2       | 9.1 b     | 2.17      | 0.07 c   | 6.39 a   | 1.97 b    | 0.43 c    | 25.9      | 43.8 b     | 30.4       | 4.4        | 13.4        | 26.0 b       | 138.9 b  |
| 2020 x I       | 14.2       | 15.2 a    | 0.90      | 0.25 ab  | 4.66 c   | 1.92 b    | 0.86 b    | 30.6      | 49.1 a     | 35.4       | 5.6        | 13.7        | 29.9 ab      | 116.7 bc |
| 2020 x FR      | 13.7       | 14.4 a    | 1.08      | 0.27 ab  | 5.53 b   | 1.79 b    | 0.74 b    | 30.2      | 47.0 ab    | 34.2       | 4.9        | 12.8        | 29.3 ab      | 124.5 bc |
| 2020 x HR      | 18.8       | 9.5 b     | 0.89      | 0.17 bc  | 6.11 ab  | 2.68 a    | 0.44 c    | 33.3      | 51.3 a     | 37.7       | 5.1        | 13.6        | 32.6 a       | 108.7 c  |
| <b>Y x V</b>   |            |           |           |          |          |           |           |           |            |            |            |             |              |          |
| 2019 x P       | 15.1       | 11.0      | 2.20      | 0.18 ab  | 6.04 a   | 2.44      | 0.87 ab   | 23.5      | 38.3       | 26.5       | 4.7        | 11.8        | 21.8         | 169.2    |
| 2019 x M       | 16.5       | 13.8      | 2.07      | 0.22 ab  | 5.71 ab  | 2.38      | 1.01 a    | 23.5      | 35.7       | 24.5       | 4.3        | 11.2        | 20.2         | 189.2    |
| 2019 x T       | 16.5       | 14.5      | 1.77      | 0.25 ab  | 6.51 a   | 2.13      | 0.91 ab   | 20.8      | 36.3       | 24.6       | 4.1        | 11.7        | 20.5         | 192.2    |
| 2020 x P       | 14.0       | 11.3      | 1.00      | 0.25 ab  | 5.08 b   | 2.11      | 0.66 ab   | 32.1      | 50.3       | 36.9       | 5.3        | 13.4        | 31.5         | 112.4    |
| 2020 x M       | 16.3       | 13.1      | 0.92      | 0.29 a   | 5.63 ab  | 2.29      | 0.78 ab   | 30.5      | 47.7       | 34.5       | 5.0        | 13.2        | 29.5         | 122.6    |
| 2020 x T       | 16.4       | 14.6      | 0.96      | 0.16 b   | 5.59 ab  | 1.99      | 0.59 b    | 31.5      | 49.4       | 35.9       | 5.2        | 13.5        | 30.8         | 114.9    |
| <b>WEC x V</b> |            |           |           |          |          |           |           |           |            |            |            |             |              |          |
| I x P          | 11.1 d     | 12.7 c    | 1.55      | 0.31     | 4.91     | 1.95      | 0.92      | 27.2      | 44.7       | 32.5 ab    | 5.6        | 12.3        | 26.9 ab      | 136.7    |
| I x M          | 15.5 c     | 16.7 ab   | 1.28      | 0.33     | 4.91     | 2.21      | 1.15      | 26.5      | 41.2       | 28.8 ab    | 5.0        | 12.4        | 23.8 ab      | 157.8    |
| I x T          | 15.6 bc    | 17.2 a    | 1.16      | 0.29     | 5.80     | 2.09      | 1.05      | 23.0      | 39.1       | 27.2 ab    | 4.8        | 11.9        | 22.4 ab      | 173.4    |
| FR x P         | 13.6 cd    | 11.5 cd   | 1.59      | 0.20     | 5.83     | 2.49      | 0.89      | 26.5      | 40.3       | 28.8 ab    | 4.5        | 11.5        | 24.3 ab      | 161.7    |
| FR x M         | 14.3 c     | 14.1 bc   | 1.83      | 0.30     | 5.86     | 2.39      | 1.16      | 25.3      | 36.8       | 25.8 b     | 4.2        | 11.0        | 21.5 b       | 184.1    |
| FR x T         | 15.0 c     | 17.3 a    | 1.37      | 0.25     | 5.79     | 1.92      | 0.88      | 25.6      | 41.8       | 29.2 ab    | 4.5        | 12.6        | 24.8 ab      | 165.5    |
| HR x P         | 18.9 a     | 9.3 d     | 1.66      | 0.13     | 5.94     | 2.39      | 0.49      | 29.6      | 47.8       | 33.8 ab    | 4.9        | 13.9        | 29.0 ab      | 123.9    |
| HR x M         | 19.3 a     | 9.5 d     | 1.37      | 0.14     | 6.25     | 2.41      | 0.59      | 29.3      | 47.1       | 34.0 ab    | 4.7        | 13.2        | 29.2 ab      | 125.9    |
| HR x T         | 18.8 ab    | 9.1 d     | 1.56      | 0.09     | 6.56     | 2.17      | 0.33      | 29.8      | 47.2       | 34.4 a     | 4.6        | 13.4        | 29.8 a       | 121.7    |

Different lowercase letters within the same column indicate significant difference at  $p < 0.05$  according to Tukey's test.. n.s.: not significant; significant at \* $p < 0.05$ ; \*\* $p < 0.01$  and \*\*\* $p < 0.001$ . I: irrigated. FR: fresh rainfed. HR hard rainfed

**Table S3.** Results of interactions between treatments for the minor fatty acids contents in seeds harvested from three quinoa varieties (Pasto, Marisma, and Titicaca) grown under three different environmental conditions (I, FR, HR) during two consecutive years (2019, 2020).

| Treatment      | NU<br>(kg ha <sup>-1</sup> ) | PU<br>(kg ha <sup>-1</sup> ) | KU<br>(kg ha <sup>-1</sup> ) | CaU<br>(kg ha <sup>-1</sup> ) | MgU<br>(kg ha <sup>-1</sup> ) | NUtE<br>(kg/kg) | PUtE<br>(kg/kg) | KUtE<br>(kg/kg) | CaUtE<br>(kg/kg) | MgUtE<br>(kg/kg) | NHI     | PHI  | KHI     | CaHI | MgHI |
|----------------|------------------------------|------------------------------|------------------------------|-------------------------------|-------------------------------|-----------------|-----------------|-----------------|------------------|------------------|---------|------|---------|------|------|
| <b>Y x WEC</b> |                              |                              |                              |                               |                               |                 |                 |                 |                  |                  |         |      |         |      |      |
| 2019 x I       | 118.2 a                      | 17.0 a                       | 175.7 ab                     | 63.5 a                        | 37.6 a                        | 17.2            | 124.8 b         | 11.8 a          | 33.2             | 56.1             | 0.42 b  | 0.41 | 0.11 a  | 0.03 | 0.12 |
| 2019 x FR      | 49.0 b                       | 5.3 b                        | 83.1 d                       | 35.2 c                        | 15.4 c                        | 19.1            | 191.8 b         | 11.9 a          | 30.5             | 66.9             | 0.47 ab | 0.56 | 0.13 ab | 0.05 | 0.14 |
| 2019 x HR      | 51.7 b                       | 3.3 b                        | 141.6 bc                     | 42.2 bc                       | 10.4 c                        | 16.1            | 264.8 a         | 5.7 b           | 20.6             | 90.6             | 0.41 b  | 0.54 | 0.06 c  | 0.02 | 0.14 |
| 2020 x I       | 113.5 a                      | 14.6 a                       | 142.5 bc                     | 51.9 abc                      | 26.5 b                        | 18.0            | 138.3 b         | 14.4 a          | 39.9             | 78.5             | 0.46 b  | 0.56 | 0.16 a  | 0.06 | 0.18 |
| 2020 x FR      | 125.0 a                      | 18.5 a                       | 195.9 a                      | 57.1 ab                       | 28.1 ab                       | 18.3            | 123.7 b         | 11.7 a          | 41.6             | 83.0             | 0.44 b  | 0.56 | 0.14 ab | 0.05 | 0.20 |
| 2020 x HR      | 62.0 b                       | 7.9 b                        | 175.7 ab                     | 48.6 abc                      | 10.5 c                        | 20.1            | 165.6 b         | 10.3 a          | 26.3             | 104.9            | 0.57 a  | 0.62 | 0.12 ab | 0.03 | 0.24 |
| <b>Y x V</b>   |                              |                              |                              |                               |                               |                 |                 |                 |                  |                  |         |      |         |      |      |
| 2019 x P       | 79.0 ab                      | 10.7                         | 160.8 ab                     | 57.8 a                        | 25.4 a                        | 17.3            | 172.1           | 8.5             | 22.7             | 59.7             | 0.44    | 0.54 | 0.10    | 0.03 | 0.13 |
| 2019 x M       | 83.4 ab                      | 9.2                          | 138.0 ab                     | 53.0 a                        | 24.9 a                        | 16.2            | 178.0           | 9.7             | 24.9             | 58.0             | 0.40    | 0.48 | 0.10    | 0.03 | 0.11 |
| 2019 x T       | 56.5 b                       | 5.6                          | 101.6 b                      | 30.1 b                        | 13.1 b                        | 18.8            | 231.2           | 11.4            | 36.8             | 95.9             | 0.46    | 0.49 | 0.10    | 0.04 | 0.15 |
| 2020 x P       | 91.9 ab                      | 14.0                         | 148.3 ab                     | 53.1 a                        | 21.1 ab                       | 20.0            | 138.9           | 12.8            | 36.8             | 93.4             | 0.51    | 0.55 | 0.15    | 0.04 | 0.20 |
| 2020 x M       | 100.8 ab                     | 15.7                         | 126.3 a                      | 57.4 a                        | 24.6 a                        | 19.0            | 126.0           | 11.7            | 34.2             | 85.4             | 0.49    | 0.54 | 0.15    | 0.04 | 0.20 |
| 2020 x T       | 107.7 a                      | 11.3                         | 149.8 ab                     | 47.1 ab                       | 19.4 ab                       | 17.4            | 162.6           | 11.9            | 37.0             | 107.7            | 0.46    | 0.60 | 0.12    | 0.05 | 0.22 |
| <b>WEC x V</b> |                              |                              |                              |                               |                               |                 |                 |                 |                  |                  |         |      |         |      |      |
| I x P          | 115.0                        | 18.8                         | 180.8                        | 63.8                          | 34.6                          | 19.2            | 122.4           | 13.1            | 36.2             | 71.0 b           | 0.46    | 0.49 | 0.15    | 0.05 | 0.16 |
| I x M          | 127.9                        | 16.8                         | 159.2                        | 63.5                          | 36.5                          | 16.5            | 123.6           | 13.3            | 34.7             | 60.7 b           | 0.43    | 0.47 | 0.15    | 0.04 | 0.14 |
| I x T          | 104.5                        | 11.8                         | 137.3                        | 45.7                          | 25.1                          | 17.2            | 148.6           | 12.8            | 38.8             | 70.2 b           | 0.43    | 0.50 | 0.11    | 0.04 | 0.14 |
| FR x P         | 80.8                         | 12.2                         | 144.5                        | 51.0                          | 23.0                          | 20.6            | 161.8           | 11.5            | 33.9             | 76.1 b           | 0.50    | 0.62 | 0.14    | 0.04 | 0.18 |
| FR x M         | 89.0                         | 13.9                         | 148.0                        | 51.6                          | 25.4                          | 18.2            | 143.6           | 10.9            | 31.4             | 62.7 b           | 0.45    | 0.51 | 0.14    | 0.05 | 0.15 |
| FR x T         | 91.3                         | 9.5                          | 126.0                        | 35.9                          | 17.0                          | 17.3            | 167.8           | 13.1            | 42.9             | 86.2 b           | 0.42    | 0.55 | 0.13    | 0.06 | 0.19 |
| HR x P         | 60.7                         | 6.1                          | 138.5                        | 51.7                          | 13.2                          | 16.1            | 182.4           | 7.4             | 19.0             | 82.6 b           | 0.46    | 0.52 | 0.09    | 0.02 | 0.16 |
| HR x M         | 59.4                         | 6.6                          | 143.2                        | 50.4                          | 12.4                          | 18.2            | 188.9           | 7.9             | 22.4             | 91.9 b           | 0.47    | 0.56 | 0.10    | 0.03 | 0.18 |
| HR x T         | 50.5                         | 4.1                          | 113.8                        | 34.2                          | 6.7                           | 19.9            | 204.1           | 9.1             | 29.0             | 148.9 a          | 0.54    | 0.66 | 0.09    | 0.03 | 0.23 |

Different lowercase letters within the same column indicate significant difference at  $p < 0.05$  according to Tukey's test. n.s.: not significant; significant at \* $p < 0.05$ ; \*\* $p < 0.01$  and \*\*\* $p < 0.001$ . I: irrigated. FR: fresh rainfed. HR: hard rainfed. P: Pasto; M: Marisma; T: Titicaca.

**Table S4.** PCA rotated component matrix.

| Influence | Component     |        |       |        |             |        |
|-----------|---------------|--------|-------|--------|-------------|--------|
|           | 1             |        | 2     |        | 3           |        |
| Positive  | Cellulose     | 0.985  | KUtE  | 0.96   | Straw yield | 0.96   |
|           | ADF           | 0.978  | HI    | 0.938  | KU          | 0.904  |
|           | NDF           | 0.977  | KHI   | 0.9    | NU          | 0.853  |
|           | GF            | 0.957  | CaUtE | 0.833  | CaU         | 0.837  |
|           | Hemicellulose | 0.855  | CaHI  | 0.796  | MgU         | 0.813  |
|           | MgHI          | 0.831  | P     | 0.721  | PU          | 0.778  |
|           | MgUtE         | 0.731  | CP    | 0.601  | ADL         | 0.529  |
|           | PHI           | 0.628  | PU    | 0.542  |             |        |
|           | ADL           | 0.619  | Mg    | 0.525  |             |        |
|           | NHI           | 0.489  | NUtE  | 0.517  |             |        |
|           |               |        | NU    | 0.411  |             |        |
|           |               |        |       |        |             |        |
| Negative  | RFV           | -0.956 | Ash   | -0.698 | NHI         | -0.601 |
|           | Mg            | -0.814 | PUtE  | -0.628 | K           | -0.579 |
|           | CF            | -0.698 | K     | -0.535 | Ca          | -0.573 |
|           | CP            | -0.460 | CF    | -0.525 | NUtE        | -0.547 |
|           | P             | -0.406 |       |        | PUtE        | -0.534 |
|           |               |        |       |        | MgUtE       | -0.496 |
|           |               |        |       |        | PHI         | -0.467 |

**Table S5.** t-Student comparisons. **A.** Year 2019. **B.** Year 2020. Tables containing the p-value of the comparison between straw and seed mineral content. P-adjusted calculated by applying a BH correction in all the comparisons performed for each mineral. Significant differences considering the p-adjusted are indicated with \*.



**A.**

| Environmental conditions | Cultivar | Mineral | p.value     | p.adjusted  | Significance |
|--------------------------|----------|---------|-------------|-------------|--------------|
| HR                       | Pasto    | P       | 6.92687E-05 | 0.000623418 | *            |
|                          |          | K       | 0.003211811 | 0.004447123 | *            |
|                          |          | Ca      | 0.003672094 | 0.00647574  | *            |
|                          |          | Mg      | 0.00345344  | 0.01036032  | *            |
|                          | Marisma  | P       | 0.004209938 | 0.015155777 | *            |
|                          |          | K       | 0.002123959 | 0.003475569 | *            |
|                          |          | Ca      | 0.001764432 | 0.006106872 | *            |
|                          |          | Mg      | 0.004927527 | 0.012670784 | *            |
|                          | Titicaca | P       | 0.038011005 | 0.052630622 |              |
|                          |          | K       | 0.002904883 | 0.004357325 | *            |
|                          |          | Ca      | 3.12764E-07 | 5.62975E-06 | *            |
|                          |          | Mg      | 0.007371433 | 0.016585724 | *            |
| FR                       | Pasto    | P       | 0.00312432  | 0.01405944  | *            |
|                          |          | K       | 0.012849361 | 0.012849361 | *            |
|                          |          | Ca      | 0.007200339 | 0.009257579 | *            |
|                          |          | Mg      | 0.082172438 | 0.082172438 |              |
|                          | Marisma  | P       | 0.573700988 | 0.607448105 |              |
|                          |          | K       | 0.003672236 | 0.004721446 | *            |
|                          |          | Ca      | 0.005067068 | 0.00701594  | *            |
|                          |          | Mg      | 0.013297703 | 0.019946555 | *            |
|                          | Titicaca | P       | 0.663917607 | 0.663917607 |              |
|                          |          | K       | 5.79845E-05 | 0.000347907 | *            |
|                          |          | Ca      | 0.002683746 | 0.00647574  | *            |
|                          |          | Mg      | 0.023056029 | 0.027667235 | *            |
| I                        | Pasto    | P       | 0.233227361 | 0.262380781 |              |
|                          |          | K       | 0.000677818 | 0.001742961 | *            |
|                          |          | Ca      | 4.02173E-06 | 3.61956E-05 | *            |
|                          |          | Mg      | 0.003336406 | 0.01036032  | *            |
|                          | Marisma  | P       | 0.226427032 | 0.262380781 |              |
|                          |          | K       | 0.000226007 | 0.000760788 | *            |
|                          |          | Ca      | 0.003489547 | 0.00647574  | *            |
|                          |          | Mg      | 0.012813189 | 0.019946555 | *            |
|                          | Titicaca | P       | 0.030318142 | 0.049611505 | *            |
|                          |          | K       | 0.000031189 | 0.000280701 | *            |
|                          |          | Ca      | 0.008017493 | 0.009620992 | *            |
|                          |          | Mg      | 0.010103445 | 0.019946555 | *            |
| HR                       | Pasto    | P       | 0.036717981 | 0.052630622 |              |
|                          |          | K       | 0.000847265 | 0.001906346 | *            |
|                          |          | Ca      | 0.020369281 | 0.021567474 | *            |
|                          |          | Mg      | 0.002626093 | 0.01036032  | *            |
|                          | Marisma  | P       | 0.021575353 | 0.038835635 | *            |
|                          |          | K       | 0.001534285 | 0.002761713 | *            |
|                          |          | Ca      | 0.027549119 | 0.027549119 | *            |
|                          |          | Mg      | 0.029165787 | 0.030881422 | *            |
|                          | Titicaca | P       | 0.001929296 | 0.011575776 | *            |
|                          |          | K       | 0.004843933 | 0.005449425 | *            |
|                          |          | Ca      | 0.001174069 | 0.006106872 | *            |
|                          |          | Mg      | 0.022312565 | 0.027667235 | *            |

**B.**

| Environmental conditions | Cultivar | Mineral | p.value     | p.adjusted    | Significance |
|--------------------------|----------|---------|-------------|---------------|--------------|
| HR                       | Pasto    | P       | 0.036717981 | 0.052630622   |              |
|                          |          | K       | 0.000847265 | 0.001906346 * |              |
|                          |          | Ca      | 0.020369281 | 0.021567474 * |              |
|                          |          | Mg      | 0.002626093 | 0.01036032 *  |              |
|                          | Marisma  | P       | 0.021575353 | 0.038835635 * |              |
|                          |          | K       | 0.001534285 | 0.002761713 * |              |
|                          |          | Ca      | 0.027549119 | 0.027549119 * |              |
|                          |          | Mg      | 0.029165787 | 0.030881422 * |              |
|                          | Titicaca | P       | 0.001929296 | 0.011575776 * |              |
|                          |          | K       | 0.004843933 | 0.005449425 * |              |
|                          |          | Ca      | 0.001174069 | 0.006106872 * |              |
|                          |          | Mg      | 0.022312565 | 0.027667235 * |              |
| FR                       | Pasto    | P       | 0.008229341 | 0.018618651 * |              |
|                          |          | K       | 2.87634E-06 | 5.17741E-05 * |              |
|                          |          | Ca      | 0.010781513 | 0.012129202 * |              |
|                          |          | Mg      | 0.016064931 | 0.022243751 * |              |
|                          | Marisma  | P       | 0.048708065 | 0.062624655   |              |
|                          |          | K       | 0.004754641 | 0.005449425 * |              |
|                          |          | Ca      | 0.003627399 | 0.00647574 *  |              |
|                          |          | Mg      | 0.001058914 | 0.009530226 * |              |
|                          | Titicaca | P       | 5.88852E-05 | 0.000623418 * |              |
|                          |          | K       | 9.44204E-05 | 0.000424892 * |              |
|                          |          | Ca      | 0.004103277 | 0.00647574 *  |              |
|                          |          | Mg      | 0.024718877 | 0.027808737 * |              |
| I                        | Pasto    | P       | 0.005657994 | 0.016973982 * |              |
|                          |          | K       | 0.006723923 | 0.007119448 * |              |
|                          |          | Ca      | 0.001791979 | 0.006106872 * |              |
|                          |          | Mg      | 0.002186824 | 0.01036032 *  |              |
|                          | Marisma  | P       | 0.014391036 | 0.028782072 * |              |
|                          |          | K       | 0.000253596 | 0.000760788 * |              |
|                          |          | Ca      | 0.00431716  | 0.00647574 *  |              |
|                          |          | Mg      | 0.012396747 | 0.019946555 * |              |
|                          | Titicaca | P       | 0.008274956 | 0.018618651 * |              |
|                          |          | K       | 0.001453019 | 0.002761713 * |              |
|                          |          | Ca      | 0.002035624 | 0.006106872 * |              |
|                          |          | Mg      | 9.61807E-08 | 1.73125E-06 * |              |

# SUPPLEMENTARY FILE 1

|               | Straw yield | HI     | Ash    | CP     | CF     | P      |
|---------------|-------------|--------|--------|--------|--------|--------|
| Straw yield   | 1.000       | -0.317 | -0.194 | -0.134 | 0.019  | 0.177  |
| HI            | -0.317      | 1.000  | -0.482 | 0.729  | -0.507 | 0.507  |
| Ash           | -0.194      | -0.482 | 1.000  | -0.395 | 0.188  | -0.518 |
| CP            | -0.134      | 0.729  | -0.395 | 1.000  | -0.503 | 0.712  |
| CF            | 0.019       | -0.507 | 0.188  | -0.503 | 1.000  | -0.514 |
| P             | 0.177       | 0.507  | -0.518 | 0.712  | -0.514 | 1.000  |
| K             | -0.475      | -0.082 | 0.483  | -0.292 | -0.023 | -0.264 |
| Ca            | -0.339      | 0.341  | -0.156 | 0.223  | 0.094  | 0.115  |
| Mg            | -0.058      | 0.621  | -0.706 | 0.767  | -0.303 | 0.807  |
| GF            | 0.279       | -0.584 | 0.527  | -0.644 | 0.470  | -0.793 |
| NDF           | 0.353       | -0.641 | 0.514  | -0.712 | 0.308  | -0.673 |
| ADF           | 0.413       | -0.609 | 0.407  | -0.692 | 0.309  | -0.658 |
| ADL           | 0.739       | -0.294 | -0.165 | -0.144 | 0.175  | 0.117  |
| Hemicellulose | 0.066       | -0.497 | 0.613  | -0.508 | 0.196  | -0.472 |
| Cellulose     | 0.328       | -0.604 | 0.459  | -0.716 | 0.302  | -0.718 |
| RFV           | -0.456      | 0.663  | -0.461 | 0.704  | -0.253 | 0.625  |
| NU            | 0.834       | 0.162  | -0.389 | 0.389  | -0.273 | 0.493  |
| PU            | 0.804       | 0.196  | -0.559 | 0.375  | -0.270 | 0.645  |
| KU            | 0.981       | -0.338 | -0.133 | -0.207 | 0.003  | 0.132  |
| CaU           | 0.922       | -0.202 | -0.269 | -0.022 | 0.037  | 0.243  |
| MgU           | 0.786       | 0.147  | -0.609 | 0.381  | -0.201 | 0.613  |
| NUtE          | -0.285      | 0.713  | -0.306 | 0.070  | -0.241 | 0.089  |
| PUtE          | -0.320      | -0.070 | 0.457  | -0.488 | 0.119  | -0.710 |
| KUtE          | -0.238      | 0.963  | -0.491 | 0.777  | -0.523 | 0.553  |
| CaUtE         | -0.221      | 0.874  | -0.351 | 0.640  | -0.608 | 0.487  |
| MgUtE         | -0.225      | 0.141  | 0.403  | -0.297 | -0.184 | -0.443 |
| NHI           | -0.356      | 0.686  | -0.179 | 0.049  | -0.191 | -0.066 |
| PHI           | -0.279      | 0.061  | 0.206  | -0.342 | 0.322  | -0.777 |
| KHI           | -0.193      | 0.850  | -0.610 | 0.615  | -0.330 | 0.408  |
| CaHI          | -0.347      | 0.581  | -0.309 | 0.400  | -0.029 | 0.095  |
| MgHI          | -0.232      | 0.317  | 0.200  | -0.147 | -0.081 | -0.424 |

| K      | Ca     | Mg     | GF     | NDF    | ADF    | ADL    |
|--------|--------|--------|--------|--------|--------|--------|
| -0.475 | -0.339 | -0.058 | 0.279  | 0.353  | 0.413  | 0.739  |
| -0.082 | 0.341  | 0.621  | -0.584 | -0.641 | -0.609 | -0.294 |
| 0.483  | -0.156 | -0.706 | 0.527  | 0.514  | 0.407  | -0.165 |
| -0.292 | 0.223  | 0.767  | -0.644 | -0.712 | -0.692 | -0.144 |
| -0.023 | 0.094  | -0.303 | 0.470  | 0.308  | 0.309  | 0.175  |
| -0.264 | 0.115  | 0.807  | -0.793 | -0.673 | -0.658 | 0.117  |
| 1.000  | 0.095  | -0.450 | -0.042 | 0.104  | 0.031  | -0.282 |
| 0.095  | 1.000  | 0.447  | -0.318 | -0.670 | -0.694 | -0.513 |
| -0.450 | 0.447  | 1.000  | -0.788 | -0.883 | -0.847 | -0.143 |
| -0.042 | -0.318 | -0.788 | 1.000  | 0.808  | 0.830  | 0.202  |
| 0.104  | -0.670 | -0.883 | 0.808  | 1.000  | 0.966  | 0.407  |
| 0.031  | -0.694 | -0.847 | 0.830  | 0.966  | 1.000  | 0.497  |
| -0.282 | -0.513 | -0.143 | 0.202  | 0.407  | 0.497  | 1.000  |
| 0.260  | -0.364 | -0.662 | 0.457  | 0.730  | 0.529  | 0.023  |
| 0.074  | -0.664 | -0.881 | 0.854  | 0.969  | 0.992  | 0.380  |
| -0.061 | 0.653  | 0.856  | -0.794 | -0.968 | -0.955 | -0.502 |
| -0.566 | -0.140 | 0.323  | -0.040 | -0.062 | 0.017  | 0.558  |
| -0.513 | -0.074 | 0.458  | -0.215 | -0.188 | -0.098 | 0.591  |
| -0.308 | -0.345 | -0.151 | 0.302  | 0.398  | 0.454  | 0.735  |
| -0.494 | 0.040  | 0.138  | 0.156  | 0.097  | 0.143  | 0.560  |
| -0.651 | 0.019  | 0.552  | -0.237 | -0.251 | -0.175 | 0.506  |
| 0.138  | 0.221  | 0.177  | -0.243 | -0.209 | -0.200 | -0.270 |
| 0.298  | -0.237 | -0.677 | 0.541  | 0.541  | 0.525  | -0.286 |
| -0.264 | 0.266  | 0.671  | -0.570 | -0.617 | -0.594 | -0.256 |
| -0.045 | -0.116 | 0.400  | -0.491 | -0.345 | -0.324 | -0.111 |
| 0.465  | -0.253 | -0.607 | 0.366  | 0.456  | 0.436  | -0.229 |
| 0.189  | 0.213  | 0.016  | -0.082 | -0.127 | -0.097 | -0.282 |
| 0.208  | 0.171  | -0.486 | 0.578  | 0.356  | 0.371  | -0.213 |
| -0.397 | 0.371  | 0.661  | -0.382 | -0.589 | -0.528 | -0.200 |
| -0.022 | 0.113  | 0.293  | -0.169 | -0.207 | -0.192 | -0.125 |
| 0.467  | 0.098  | -0.433 | 0.312  | 0.271  | 0.253  | -0.199 |

| Hemicellulose | Cellulose | RFV    | NU     | PU     | KU     | CaU    |
|---------------|-----------|--------|--------|--------|--------|--------|
| 0.066         | 0.328     | -0.456 | 0.834  | 0.804  | 0.981  | 0.922  |
| -0.497        | -0.604    | 0.663  | 0.162  | 0.196  | -0.338 | -0.202 |
| 0.613         | 0.459     | -0.461 | -0.389 | -0.559 | -0.133 | -0.269 |
| -0.508        | -0.716    | 0.704  | 0.389  | 0.375  | -0.207 | -0.022 |
| 0.196         | 0.302     | -0.253 | -0.273 | -0.270 | 0.003  | 0.037  |
| -0.472        | -0.718    | 0.625  | 0.493  | 0.645  | 0.132  | 0.243  |
| 0.260         | 0.074     | -0.061 | -0.566 | -0.513 | -0.308 | -0.494 |
| -0.364        | -0.664    | 0.653  | -0.140 | -0.074 | -0.345 | 0.040  |
| -0.662        | -0.881    | 0.856  | 0.323  | 0.458  | -0.151 | 0.138  |
| 0.457         | 0.854     | -0.794 | -0.040 | -0.215 | 0.302  | 0.156  |
| 0.730         | 0.969     | -0.968 | -0.062 | -0.188 | 0.398  | 0.097  |
| 0.529         | 0.992     | -0.955 | 0.017  | -0.098 | 0.454  | 0.143  |
| 0.023         | 0.380     | -0.502 | 0.558  | 0.591  | 0.735  | 0.560  |
| 1.000         | 0.560     | -0.653 | -0.251 | -0.361 | 0.107  | -0.060 |
| 0.560         | 1.000     | -0.943 | -0.065 | -0.193 | 0.372  | 0.067  |
| -0.653        | -0.943    | 1.000  | -0.051 | 0.084  | -0.503 | -0.208 |
| -0.251        | -0.065    | -0.051 | 1.000  | 0.934  | 0.791  | 0.840  |
| -0.361        | -0.193    | 0.084  | 0.934  | 1.000  | 0.772  | 0.824  |
| 0.107         | 0.372     | -0.503 | 0.791  | 0.772  | 1.000  | 0.891  |
| -0.060        | 0.067     | -0.208 | 0.840  | 0.824  | 0.891  | 1.000  |
| -0.362        | -0.263    | 0.148  | 0.909  | 0.957  | 0.718  | 0.858  |
| -0.158        | -0.173    | 0.264  | -0.131 | -0.056 | -0.247 | -0.242 |
| 0.389         | 0.603     | -0.462 | -0.475 | -0.631 | -0.280 | -0.453 |
| -0.456        | -0.594    | 0.639  | 0.234  | 0.248  | -0.295 | -0.143 |
| -0.276        | -0.328    | 0.387  | 0.172  | 0.184  | -0.230 | -0.287 |
| 0.345         | 0.499     | -0.391 | -0.263 | -0.389 | -0.140 | -0.359 |
| -0.161        | -0.061    | 0.167  | -0.169 | -0.168 | -0.317 | -0.327 |
| 0.189         | 0.427     | -0.294 | -0.331 | -0.449 | -0.230 | -0.236 |
| -0.538        | -0.532    | 0.590  | 0.205  | 0.259  | -0.259 | -0.059 |
| -0.172        | -0.186    | 0.344  | -0.116 | -0.032 | -0.356 | -0.307 |
| 0.221         | 0.298     | -0.205 | -0.176 | -0.242 | -0.132 | -0.219 |

| MgU    | NUtE   | PUtE   | KUtE   | CaUtE  | MgUtE  | NHI    |
|--------|--------|--------|--------|--------|--------|--------|
| 0.786  | -0.285 | -0.320 | -0.238 | -0.221 | -0.225 | -0.356 |
| 0.147  | 0.713  | -0.070 | 0.963  | 0.874  | 0.141  | 0.686  |
| -0.609 | -0.306 | 0.457  | -0.491 | -0.351 | 0.403  | -0.179 |
| 0.381  | 0.070  | -0.488 | 0.777  | 0.640  | -0.297 | 0.049  |
| -0.201 | -0.241 | 0.119  | -0.523 | -0.608 | -0.184 | -0.191 |
| 0.613  | 0.089  | -0.710 | 0.553  | 0.487  | -0.443 | -0.066 |
| -0.651 | 0.138  | 0.298  | -0.264 | -0.045 | 0.465  | 0.189  |
| 0.019  | 0.221  | -0.237 | 0.266  | -0.116 | -0.253 | 0.213  |
| 0.552  | 0.177  | -0.677 | 0.671  | 0.400  | -0.607 | 0.016  |
| -0.237 | -0.243 | 0.541  | -0.570 | -0.491 | 0.366  | -0.082 |
| -0.251 | -0.209 | 0.541  | -0.617 | -0.345 | 0.456  | -0.127 |
| -0.175 | -0.200 | 0.525  | -0.594 | -0.324 | 0.436  | -0.097 |
| 0.506  | -0.270 | -0.286 | -0.256 | -0.111 | -0.229 | -0.282 |
| -0.362 | -0.158 | 0.389  | -0.456 | -0.276 | 0.345  | -0.161 |
| -0.263 | -0.173 | 0.603  | -0.594 | -0.328 | 0.499  | -0.061 |
| 0.148  | 0.264  | -0.462 | 0.639  | 0.387  | -0.391 | 0.167  |
| 0.909  | -0.131 | -0.475 | 0.234  | 0.172  | -0.263 | -0.169 |
| 0.957  | -0.056 | -0.631 | 0.248  | 0.184  | -0.389 | -0.168 |
| 0.718  | -0.247 | -0.280 | -0.295 | -0.230 | -0.140 | -0.317 |
| 0.858  | -0.242 | -0.453 | -0.143 | -0.287 | -0.359 | -0.327 |
| 1.000  | -0.121 | -0.669 | 0.227  | 0.071  | -0.520 | -0.258 |
| -0.121 | 1.000  | 0.348  | 0.623  | 0.639  | 0.473  | 0.879  |
| -0.669 | 0.348  | 1.000  | -0.121 | 0.055  | 0.868  | 0.507  |
| 0.227  | 0.623  | -0.121 | 1.000  | 0.887  | 0.041  | 0.583  |
| 0.071  | 0.639  | 0.055  | 0.887  | 1.000  | 0.298  | 0.617  |
| -0.520 | 0.473  | 0.868  | 0.041  | 0.298  | 1.000  | 0.604  |
| -0.258 | 0.879  | 0.507  | 0.583  | 0.617  | 0.604  | 1.000  |
| -0.460 | 0.354  | 0.630  | -0.051 | -0.068 | 0.522  | 0.494  |
| 0.267  | 0.593  | -0.155 | 0.885  | 0.682  | -0.084 | 0.566  |
| -0.059 | 0.428  | 0.020  | 0.537  | 0.521  | 0.099  | 0.414  |
| -0.368 | 0.545  | 0.579  | 0.163  | 0.280  | 0.770  | 0.665  |

| PHI    | KHI    | CaHI   | MgHI   |
|--------|--------|--------|--------|
| -0.279 | -0.193 | -0.347 | -0.232 |
| 0.061  | 0.850  | 0.581  | 0.317  |
| 0.206  | -0.610 | -0.309 | 0.200  |
| -0.342 | 0.615  | 0.400  | -0.147 |
| 0.322  | -0.330 | -0.029 | -0.081 |
| -0.777 | 0.408  | 0.095  | -0.424 |
| 0.208  | -0.397 | -0.022 | 0.467  |
| 0.171  | 0.371  | 0.113  | 0.098  |
| -0.486 | 0.661  | 0.293  | -0.433 |
| 0.578  | -0.382 | -0.169 | 0.312  |
| 0.356  | -0.589 | -0.207 | 0.271  |
| 0.371  | -0.528 | -0.192 | 0.253  |
| -0.213 | -0.200 | -0.125 | -0.199 |
| 0.189  | -0.538 | -0.172 | 0.221  |
| 0.427  | -0.532 | -0.186 | 0.298  |
| -0.294 | 0.590  | 0.344  | -0.205 |
| -0.331 | 0.205  | -0.116 | -0.176 |
| -0.449 | 0.259  | -0.032 | -0.242 |
| -0.230 | -0.259 | -0.356 | -0.132 |
| -0.236 | -0.059 | -0.307 | -0.219 |
| -0.460 | 0.267  | -0.059 | -0.368 |
| 0.354  | 0.593  | 0.428  | 0.545  |
| 0.630  | -0.155 | 0.020  | 0.579  |
| -0.051 | 0.885  | 0.537  | 0.163  |
| -0.068 | 0.682  | 0.521  | 0.280  |
| 0.522  | -0.084 | 0.099  | 0.770  |
| 0.494  | 0.566  | 0.414  | 0.665  |
| 1.000  | 0.112  | 0.355  | 0.768  |
| 0.112  | 1.000  | 0.575  | 0.162  |
| 0.355  | 0.575  | 1.000  | 0.427  |
| 0.768  | 0.162  | 0.427  | 1.000  |



|               | Straw yield | HI    | Ash   | CP    | CF    | P     |
|---------------|-------------|-------|-------|-------|-------|-------|
| Straw yield   | 0.000       | 0.107 | 0.333 | 0.506 | 0.923 | 0.378 |
| HI            | 0.107       | 0.000 | 0.011 | 0.000 | 0.007 | 0.007 |
| Ash           | 0.333       | 0.011 | 0.000 | 0.042 | 0.348 | 0.006 |
| CP            | 0.506       | 0.000 | 0.042 | 0.000 | 0.007 | 0.000 |
| CF            | 0.923       | 0.007 | 0.348 | 0.007 | 0.000 | 0.006 |
| P             | 0.378       | 0.007 | 0.006 | 0.000 | 0.006 | 0.000 |
| K             | 0.012       | 0.684 | 0.011 | 0.139 | 0.909 | 0.184 |
| Ca            | 0.084       | 0.082 | 0.436 | 0.263 | 0.641 | 0.568 |
| Mg            | 0.773       | 0.001 | 0.000 | 0.000 | 0.124 | 0.000 |
| GF            | 0.159       | 0.001 | 0.005 | 0.000 | 0.013 | 0.000 |
| NDF           | 0.071       | 0.000 | 0.006 | 0.000 | 0.118 | 0.000 |
| ADF           | 0.032       | 0.001 | 0.035 | 0.000 | 0.117 | 0.000 |
| ADL           | 0.000       | 0.137 | 0.411 | 0.474 | 0.382 | 0.561 |
| Hemicellulose | 0.743       | 0.008 | 0.001 | 0.007 | 0.326 | 0.013 |
| Cellulose     | 0.095       | 0.001 | 0.016 | 0.000 | 0.125 | 0.000 |
| RFV           | 0.017       | 0.000 | 0.016 | 0.000 | 0.203 | 0.000 |
| NU            | 0.000       | 0.419 | 0.045 | 0.045 | 0.169 | 0.009 |
| PU            | 0.000       | 0.327 | 0.002 | 0.054 | 0.173 | 0.000 |
| KU            | 0.000       | 0.085 | 0.508 | 0.300 | 0.986 | 0.513 |
| CaU           | 0.000       | 0.312 | 0.175 | 0.914 | 0.856 | 0.223 |
| MgU           | 0.000       | 0.463 | 0.001 | 0.050 | 0.315 | 0.001 |
| NUtE          | 0.150       | 0.000 | 0.121 | 0.728 | 0.225 | 0.659 |
| PUtE          | 0.104       | 0.730 | 0.017 | 0.010 | 0.554 | 0.000 |
| KUtE          | 0.232       | 0.000 | 0.009 | 0.000 | 0.005 | 0.003 |
| CaUtE         | 0.269       | 0.000 | 0.072 | 0.000 | 0.001 | 0.010 |
| MgUtE         | 0.258       | 0.483 | 0.037 | 0.133 | 0.358 | 0.021 |
| NHI           | 0.068       | 0.000 | 0.372 | 0.807 | 0.339 | 0.745 |
| PHI           | 0.159       | 0.762 | 0.302 | 0.081 | 0.101 | 0.000 |
| KHI           | 0.335       | 0.000 | 0.001 | 0.001 | 0.092 | 0.035 |
| CaHI          | 0.076       | 0.001 | 0.117 | 0.039 | 0.886 | 0.638 |
| MgHI          | 0.245       | 0.107 | 0.317 | 0.464 | 0.689 | 0.027 |

| K     | Ca    | Mg    | GF    | NDF   | ADF   | ADL   |
|-------|-------|-------|-------|-------|-------|-------|
| 0.012 | 0.084 | 0.773 | 0.159 | 0.071 | 0.032 | 0.000 |
| 0.684 | 0.082 | 0.001 | 0.001 | 0.000 | 0.001 | 0.137 |
| 0.011 | 0.436 | 0.000 | 0.005 | 0.006 | 0.035 | 0.411 |
| 0.139 | 0.263 | 0.000 | 0.000 | 0.000 | 0.000 | 0.474 |
| 0.909 | 0.641 | 0.124 | 0.013 | 0.118 | 0.117 | 0.382 |
| 0.184 | 0.568 | 0.000 | 0.000 | 0.000 | 0.000 | 0.561 |
| 0.000 | 0.639 | 0.019 | 0.836 | 0.607 | 0.878 | 0.153 |
| 0.639 | 0.000 | 0.019 | 0.106 | 0.000 | 0.000 | 0.006 |
| 0.019 | 0.019 | 0.000 | 0.000 | 0.000 | 0.000 | 0.476 |
| 0.836 | 0.106 | 0.000 | 0.000 | 0.000 | 0.000 | 0.313 |
| 0.607 | 0.000 | 0.000 | 0.000 | 0.000 | 0.000 | 0.035 |
| 0.878 | 0.000 | 0.000 | 0.000 | 0.000 | 0.000 | 0.008 |
| 0.153 | 0.006 | 0.476 | 0.313 | 0.035 | 0.008 | 0.000 |
| 0.191 | 0.062 | 0.000 | 0.016 | 0.000 | 0.005 | 0.910 |
| 0.712 | 0.000 | 0.000 | 0.000 | 0.000 | 0.000 | 0.050 |
| 0.764 | 0.000 | 0.000 | 0.000 | 0.000 | 0.000 | 0.008 |
| 0.002 | 0.487 | 0.101 | 0.844 | 0.758 | 0.932 | 0.003 |
| 0.006 | 0.712 | 0.016 | 0.281 | 0.347 | 0.628 | 0.001 |
| 0.118 | 0.078 | 0.451 | 0.125 | 0.040 | 0.017 | 0.000 |
| 0.009 | 0.843 | 0.494 | 0.437 | 0.630 | 0.477 | 0.002 |
| 0.000 | 0.925 | 0.003 | 0.234 | 0.206 | 0.382 | 0.007 |
| 0.491 | 0.267 | 0.378 | 0.221 | 0.295 | 0.317 | 0.174 |
| 0.131 | 0.234 | 0.000 | 0.004 | 0.004 | 0.005 | 0.148 |
| 0.184 | 0.180 | 0.000 | 0.002 | 0.001 | 0.001 | 0.198 |
| 0.824 | 0.564 | 0.039 | 0.009 | 0.078 | 0.099 | 0.580 |
| 0.014 | 0.203 | 0.001 | 0.061 | 0.017 | 0.023 | 0.252 |
| 0.345 | 0.287 | 0.936 | 0.683 | 0.527 | 0.630 | 0.154 |
| 0.297 | 0.392 | 0.010 | 0.002 | 0.068 | 0.057 | 0.286 |
| 0.040 | 0.056 | 0.000 | 0.049 | 0.001 | 0.005 | 0.317 |
| 0.913 | 0.573 | 0.138 | 0.401 | 0.301 | 0.337 | 0.533 |
| 0.014 | 0.628 | 0.024 | 0.113 | 0.172 | 0.203 | 0.321 |

| Hemicellulose | Cellulose | RFV   | NU    | PU    | KU    | CaU   |
|---------------|-----------|-------|-------|-------|-------|-------|
| 0.743         | 0.095     | 0.017 | 0.000 | 0.000 | 0.000 | 0.000 |
| 0.008         | 0.001     | 0.000 | 0.419 | 0.327 | 0.085 | 0.312 |
| 0.001         | 0.016     | 0.016 | 0.045 | 0.002 | 0.508 | 0.175 |
| 0.007         | 0.000     | 0.000 | 0.045 | 0.054 | 0.300 | 0.914 |
| 0.326         | 0.125     | 0.203 | 0.169 | 0.173 | 0.986 | 0.856 |
| 0.013         | 0.000     | 0.000 | 0.009 | 0.000 | 0.513 | 0.223 |
| 0.191         | 0.712     | 0.764 | 0.002 | 0.006 | 0.118 | 0.009 |
| 0.062         | 0.000     | 0.000 | 0.487 | 0.712 | 0.078 | 0.843 |
| 0.000         | 0.000     | 0.000 | 0.101 | 0.016 | 0.451 | 0.494 |
| 0.016         | 0.000     | 0.000 | 0.844 | 0.281 | 0.125 | 0.437 |
| 0.000         | 0.000     | 0.000 | 0.758 | 0.347 | 0.040 | 0.630 |
| 0.005         | 0.000     | 0.000 | 0.932 | 0.628 | 0.017 | 0.477 |
| 0.910         | 0.050     | 0.008 | 0.003 | 0.001 | 0.000 | 0.002 |
| 0.000         | 0.002     | 0.000 | 0.207 | 0.064 | 0.596 | 0.766 |
| 0.002         | 0.000     | 0.000 | 0.747 | 0.334 | 0.056 | 0.739 |
| 0.000         | 0.000     | 0.000 | 0.802 | 0.679 | 0.007 | 0.297 |
| 0.207         | 0.747     | 0.802 | 0.000 | 0.000 | 0.000 | 0.000 |
| 0.064         | 0.334     | 0.679 | 0.000 | 0.000 | 0.000 | 0.000 |
| 0.596         | 0.056     | 0.007 | 0.000 | 0.000 | 0.000 | 0.000 |
| 0.766         | 0.739     | 0.297 | 0.000 | 0.000 | 0.000 | 0.000 |
| 0.063         | 0.185     | 0.460 | 0.000 | 0.000 | 0.000 | 0.000 |
| 0.432         | 0.387     | 0.183 | 0.516 | 0.783 | 0.213 | 0.223 |
| 0.045         | 0.001     | 0.015 | 0.012 | 0.000 | 0.157 | 0.018 |
| 0.017         | 0.001     | 0.000 | 0.240 | 0.212 | 0.135 | 0.478 |
| 0.164         | 0.095     | 0.046 | 0.391 | 0.359 | 0.249 | 0.146 |
| 0.078         | 0.008     | 0.044 | 0.185 | 0.045 | 0.487 | 0.066 |
| 0.421         | 0.764     | 0.406 | 0.399 | 0.403 | 0.107 | 0.096 |
| 0.346         | 0.026     | 0.137 | 0.091 | 0.019 | 0.248 | 0.236 |
| 0.004         | 0.004     | 0.001 | 0.306 | 0.193 | 0.193 | 0.772 |
| 0.392         | 0.354     | 0.079 | 0.565 | 0.873 | 0.068 | 0.119 |
| 0.267         | 0.131     | 0.305 | 0.380 | 0.225 | 0.511 | 0.273 |

| MgU   | NUtE  | PUtE  | KUtE  | CaUtE | MgUtE | NHI   |
|-------|-------|-------|-------|-------|-------|-------|
| 0.000 | 0.150 | 0.104 | 0.232 | 0.269 | 0.258 | 0.068 |
| 0.463 | 0.000 | 0.730 | 0.000 | 0.000 | 0.483 | 0.000 |
| 0.001 | 0.121 | 0.017 | 0.009 | 0.072 | 0.037 | 0.372 |
| 0.050 | 0.728 | 0.010 | 0.000 | 0.000 | 0.133 | 0.807 |
| 0.315 | 0.225 | 0.554 | 0.005 | 0.001 | 0.358 | 0.339 |
| 0.001 | 0.659 | 0.000 | 0.003 | 0.010 | 0.021 | 0.745 |
| 0.000 | 0.491 | 0.131 | 0.184 | 0.824 | 0.014 | 0.345 |
| 0.925 | 0.267 | 0.234 | 0.180 | 0.564 | 0.203 | 0.287 |
| 0.003 | 0.378 | 0.000 | 0.000 | 0.039 | 0.001 | 0.936 |
| 0.234 | 0.221 | 0.004 | 0.002 | 0.009 | 0.061 | 0.683 |
| 0.206 | 0.295 | 0.004 | 0.001 | 0.078 | 0.017 | 0.527 |
| 0.382 | 0.317 | 0.005 | 0.001 | 0.099 | 0.023 | 0.630 |
| 0.007 | 0.174 | 0.148 | 0.198 | 0.580 | 0.252 | 0.154 |
| 0.063 | 0.432 | 0.045 | 0.017 | 0.164 | 0.078 | 0.421 |
| 0.185 | 0.387 | 0.001 | 0.001 | 0.095 | 0.008 | 0.764 |
| 0.460 | 0.183 | 0.015 | 0.000 | 0.046 | 0.044 | 0.406 |
| 0.000 | 0.516 | 0.012 | 0.240 | 0.391 | 0.185 | 0.399 |
| 0.000 | 0.783 | 0.000 | 0.212 | 0.359 | 0.045 | 0.403 |
| 0.000 | 0.213 | 0.157 | 0.135 | 0.249 | 0.487 | 0.107 |
| 0.000 | 0.223 | 0.018 | 0.478 | 0.146 | 0.066 | 0.096 |
| 0.000 | 0.546 | 0.000 | 0.254 | 0.726 | 0.005 | 0.193 |
| 0.546 | 0.000 | 0.075 | 0.001 | 0.000 | 0.013 | 0.000 |
| 0.000 | 0.075 | 0.000 | 0.547 | 0.783 | 0.000 | 0.007 |
| 0.254 | 0.001 | 0.547 | 0.000 | 0.000 | 0.838 | 0.001 |
| 0.726 | 0.000 | 0.783 | 0.000 | 0.000 | 0.131 | 0.001 |
| 0.005 | 0.013 | 0.000 | 0.838 | 0.131 | 0.000 | 0.001 |
| 0.193 | 0.000 | 0.007 | 0.001 | 0.001 | 0.001 | 0.000 |
| 0.016 | 0.070 | 0.000 | 0.800 | 0.736 | 0.005 | 0.009 |
| 0.179 | 0.001 | 0.440 | 0.000 | 0.000 | 0.678 | 0.002 |
| 0.771 | 0.026 | 0.922 | 0.004 | 0.005 | 0.624 | 0.032 |
| 0.059 | 0.003 | 0.002 | 0.417 | 0.158 | 0.000 | 0.000 |

| PHI   | KHI   | CaHI  | MgHI  |
|-------|-------|-------|-------|
| 0.159 | 0.335 | 0.076 | 0.245 |
| 0.762 | 0.000 | 0.001 | 0.107 |
| 0.302 | 0.001 | 0.117 | 0.317 |
| 0.081 | 0.001 | 0.039 | 0.464 |
| 0.101 | 0.092 | 0.886 | 0.689 |
| 0.000 | 0.035 | 0.638 | 0.027 |
| 0.297 | 0.040 | 0.913 | 0.014 |
| 0.392 | 0.056 | 0.573 | 0.628 |
| 0.010 | 0.000 | 0.138 | 0.024 |
| 0.002 | 0.049 | 0.401 | 0.113 |
| 0.068 | 0.001 | 0.301 | 0.172 |
| 0.057 | 0.005 | 0.337 | 0.203 |
| 0.286 | 0.317 | 0.533 | 0.321 |
| 0.346 | 0.004 | 0.392 | 0.267 |
| 0.026 | 0.004 | 0.354 | 0.131 |
| 0.137 | 0.001 | 0.079 | 0.305 |
| 0.091 | 0.306 | 0.565 | 0.380 |
| 0.019 | 0.193 | 0.873 | 0.225 |
| 0.248 | 0.193 | 0.068 | 0.511 |
| 0.236 | 0.772 | 0.119 | 0.273 |
| 0.016 | 0.179 | 0.771 | 0.059 |
| 0.070 | 0.001 | 0.026 | 0.003 |
| 0.000 | 0.440 | 0.922 | 0.002 |
| 0.800 | 0.000 | 0.004 | 0.417 |
| 0.736 | 0.000 | 0.005 | 0.158 |
| 0.005 | 0.678 | 0.624 | 0.000 |
| 0.009 | 0.002 | 0.032 | 0.000 |
| 0.000 | 0.578 | 0.070 | 0.000 |
| 0.578 | 0.000 | 0.002 | 0.420 |
| 0.070 | 0.002 | 0.000 | 0.027 |
| 0.000 | 0.420 | 0.027 | 0.000 |

|               | Straw yield | HI     | Ash    | CP     | CF     | P      |
|---------------|-------------|--------|--------|--------|--------|--------|
| Straw yield   | 1.000       | -0.314 | -0.561 | 0.570  | 0.031  | 0.436  |
| HI            | -0.314      | 1.000  | -0.085 | 0.030  | 0.135  | 0.069  |
| Ash           | -0.561      | -0.085 | 1.000  | -0.223 | -0.396 | -0.354 |
| CP            | 0.570       | 0.030  | -0.223 | 1.000  | -0.182 | 0.240  |
| CF            | 0.031       | 0.135  | -0.396 | -0.182 | 1.000  | 0.001  |
| P             | 0.436       | 0.069  | -0.354 | 0.240  | 0.001  | 1.000  |
| K             | -0.369      | 0.006  | 0.674  | -0.423 | 0.059  | -0.208 |
| Ca            | -0.627      | -0.012 | 0.561  | -0.564 | 0.020  | -0.429 |
| Mg            | 0.592       | 0.123  | -0.567 | 0.458  | 0.051  | 0.646  |
| GF            | -0.409      | -0.203 | 0.213  | -0.373 | -0.173 | -0.283 |
| NDF           | -0.357      | -0.095 | 0.260  | -0.184 | -0.386 | -0.274 |
| ADF           | -0.399      | -0.087 | 0.234  | -0.284 | -0.379 | -0.324 |
| ADL           | -0.053      | -0.115 | -0.156 | 0.098  | -0.338 | 0.035  |
| Hemicellulose | -0.125      | -0.082 | 0.230  | 0.132  | -0.261 | -0.051 |
| Cellulose     | -0.420      | -0.074 | 0.280  | -0.326 | -0.346 | -0.357 |
| RFV           | 0.379       | 0.088  | -0.250 | 0.210  | 0.374  | 0.335  |
| NU            | 0.811       | 0.144  | -0.478 | 0.858  | -0.005 | 0.379  |
| PU            | 0.709       | 0.272  | -0.571 | 0.476  | 0.126  | 0.811  |
| KU            | 0.892       | -0.148 | -0.344 | 0.427  | 0.065  | 0.473  |
| CaU           | 0.611       | -0.303 | -0.210 | 0.163  | 0.071  | 0.236  |
| MgU           | 0.835       | 0.008  | -0.642 | 0.560  | 0.090  | 0.643  |
| NUtE          | -0.492      | 0.743  | -0.030 | -0.582 | 0.211  | -0.027 |
| PUtE          | -0.606      | 0.444  | 0.324  | -0.284 | 0.127  | -0.807 |
| KUtE          | -0.133      | 0.875  | -0.378 | 0.230  | 0.101  | 0.086  |
| CaUtE         | 0.114       | 0.814  | -0.370 | 0.362  | 0.047  | 0.286  |
| MgUtE         | -0.802      | 0.508  | 0.474  | -0.435 | 0.096  | -0.581 |
| NHI           | -0.757      | 0.625  | 0.261  | -0.719 | 0.188  | -0.250 |
| PHI           | -0.507      | 0.632  | 0.203  | -0.143 | 0.196  | -0.688 |
| KHI           | -0.083      | 0.868  | -0.341 | 0.168  | 0.070  | 0.337  |
| CaHI          | 0.056       | 0.618  | -0.289 | 0.485  | -0.005 | 0.167  |
| MgHI          | -0.627      | 0.656  | 0.309  | -0.273 | 0.080  | -0.353 |

| K      | Ca     | Mg     | GF     | NDF    | ADF    | ADL    |
|--------|--------|--------|--------|--------|--------|--------|
| -0.369 | -0.627 | 0.592  | -0.409 | -0.357 | -0.399 | -0.053 |
| 0.006  | -0.012 | 0.123  | -0.203 | -0.095 | -0.087 | -0.115 |
| 0.674  | 0.561  | -0.567 | 0.213  | 0.260  | 0.234  | -0.156 |
| -0.423 | -0.564 | 0.458  | -0.373 | -0.184 | -0.284 | 0.098  |
| 0.059  | 0.020  | 0.051  | -0.173 | -0.386 | -0.379 | -0.338 |
| -0.208 | -0.429 | 0.646  | -0.283 | -0.274 | -0.324 | 0.035  |
| 1.000  | 0.503  | -0.521 | 0.022  | -0.138 | -0.109 | -0.594 |
| 0.503  | 1.000  | -0.430 | 0.029  | -0.105 | -0.029 | -0.314 |
| -0.521 | -0.430 | 1.000  | -0.603 | -0.513 | -0.566 | 0.197  |
| 0.022  | 0.029  | -0.603 | 1.000  | 0.864  | 0.881  | 0.347  |
| -0.138 | -0.105 | -0.513 | 0.864  | 1.000  | 0.961  | 0.582  |
| -0.109 | -0.029 | -0.566 | 0.881  | 0.961  | 1.000  | 0.514  |
| -0.594 | -0.314 | 0.197  | 0.347  | 0.582  | 0.514  | 1.000  |
| -0.158 | -0.254 | -0.194 | 0.505  | 0.731  | 0.515  | 0.537  |
| -0.008 | 0.025  | -0.648 | 0.890  | 0.933  | 0.987  | 0.371  |
| 0.131  | 0.084  | 0.533  | -0.867 | -0.990 | -0.978 | -0.578 |
| -0.405 | -0.651 | 0.621  | -0.512 | -0.366 | -0.428 | -0.071 |
| -0.276 | -0.624 | 0.723  | -0.501 | -0.449 | -0.488 | -0.131 |
| 0.033  | -0.483 | 0.458  | -0.462 | -0.469 | -0.495 | -0.360 |
| -0.036 | 0.204  | 0.431  | -0.521 | -0.595 | -0.572 | -0.375 |
| -0.469 | -0.582 | 0.924  | -0.612 | -0.537 | -0.582 | 0.053  |
| 0.197  | 0.222  | -0.133 | 0.056  | 0.034  | 0.091  | -0.103 |
| 0.229  | 0.537  | -0.496 | 0.071  | 0.105  | 0.158  | -0.106 |
| -0.461 | -0.241 | 0.298  | -0.145 | 0.029  | 0.018  | 0.199  |
| -0.262 | -0.559 | 0.299  | -0.180 | -0.008 | -0.023 | 0.079  |
| 0.470  | 0.476  | -0.745 | 0.381  | 0.330  | 0.377  | -0.192 |
| 0.391  | 0.518  | -0.339 | 0.197  | 0.130  | 0.203  | -0.155 |
| 0.234  | 0.274  | -0.404 | 0.010  | 0.041  | 0.076  | -0.222 |
| -0.360 | -0.259 | 0.338  | -0.141 | -0.015 | -0.013 | 0.051  |
| -0.334 | -0.491 | 0.232  | -0.152 | 0.010  | -0.019 | 0.105  |
| 0.400  | 0.202  | -0.616 | 0.353  | 0.326  | 0.366  | -0.247 |

|               | Straw yield | HI     | Ash    | CP     | CF     | P      |
|---------------|-------------|--------|--------|--------|--------|--------|
| Straw yield   | 1.000       | -0.317 | -0.194 | -0.134 | 0.019  | 0.177  |
| HI            | -0.317      | 1.000  | -0.482 | 0.729  | -0.507 | 0.507  |
| Ash           | -0.194      | -0.482 | 1.000  | -0.395 | 0.188  | -0.518 |
| CP            | -0.134      | 0.729  | -0.395 | 1.000  | -0.503 | 0.712  |
| CF            | 0.019       | -0.507 | 0.188  | -0.503 | 1.000  | -0.514 |
| P             | 0.177       | 0.507  | -0.518 | 0.712  | -0.514 | 1.000  |
| K             | -0.475      | -0.082 | 0.483  | -0.292 | -0.023 | -0.264 |
| Ca            | -0.339      | 0.341  | -0.156 | 0.223  | 0.094  | 0.115  |
| Mg            | -0.058      | 0.621  | -0.706 | 0.767  | -0.303 | 0.807  |
| GF            | 0.279       | -0.584 | 0.527  | -0.644 | 0.470  | -0.793 |
| NDF           | 0.353       | -0.641 | 0.514  | -0.712 | 0.308  | -0.673 |
| ADF           | 0.413       | -0.609 | 0.407  | -0.692 | 0.309  | -0.658 |
| ADL           | 0.739       | -0.294 | -0.165 | -0.144 | 0.175  | 0.117  |
| Hemicellulose | 0.066       | -0.497 | 0.613  | -0.508 | 0.196  | -0.472 |
| Cellulose     | 0.328       | -0.604 | 0.459  | -0.716 | 0.302  | -0.718 |
| RFV           | -0.456      | 0.663  | -0.461 | 0.704  | -0.253 | 0.625  |
| NU            | 0.834       | 0.162  | -0.389 | 0.389  | -0.273 | 0.493  |
| PU            | 0.804       | 0.196  | -0.559 | 0.375  | -0.270 | 0.645  |
| KU            | 0.981       | -0.338 | -0.133 | -0.207 | 0.003  | 0.132  |
| CaU           | 0.922       | -0.202 | -0.269 | -0.022 | 0.037  | 0.243  |
| MgU           | 0.786       | 0.147  | -0.609 | 0.381  | -0.201 | 0.613  |
| NUtE          | -0.285      | 0.713  | -0.306 | 0.070  | -0.241 | 0.089  |
| PUtE          | -0.320      | -0.070 | 0.457  | -0.488 | 0.119  | -0.710 |
| KUtE          | -0.238      | 0.963  | -0.491 | 0.777  | -0.523 | 0.553  |
| CaUtE         | -0.221      | 0.874  | -0.351 | 0.640  | -0.608 | 0.487  |
| MgUtE         | -0.225      | 0.141  | 0.403  | -0.297 | -0.184 | -0.443 |
| NHI           | -0.356      | 0.686  | -0.179 | 0.049  | -0.191 | -0.066 |
| PHI           | -0.279      | 0.061  | 0.206  | -0.342 | 0.322  | -0.777 |
| KHI           | -0.193      | 0.850  | -0.610 | 0.615  | -0.330 | 0.408  |
| CaHI          | -0.347      | 0.581  | -0.309 | 0.400  | -0.029 | 0.095  |
| MgHI          | -0.232      | 0.317  | 0.200  | -0.147 | -0.081 | -0.424 |



| K      | Ca     | Mg     | GF     | NDF    | ADF    | ADL    |
|--------|--------|--------|--------|--------|--------|--------|
| -0.475 | -0.339 | -0.058 | 0.279  | 0.353  | 0.413  | 0.739  |
| -0.082 | 0.341  | 0.621  | -0.584 | -0.641 | -0.609 | -0.294 |
| 0.483  | -0.156 | -0.706 | 0.527  | 0.514  | 0.407  | -0.165 |
| -0.292 | 0.223  | 0.767  | -0.644 | -0.712 | -0.692 | -0.144 |
| -0.023 | 0.094  | -0.303 | 0.470  | 0.308  | 0.309  | 0.175  |
| -0.264 | 0.115  | 0.807  | -0.793 | -0.673 | -0.658 | 0.117  |
| 1.000  | 0.095  | -0.450 | -0.042 | 0.104  | 0.031  | -0.282 |
| 0.095  | 1.000  | 0.447  | -0.318 | -0.670 | -0.694 | -0.513 |
| -0.450 | 0.447  | 1.000  | -0.788 | -0.883 | -0.847 | -0.143 |
| -0.042 | -0.318 | -0.788 | 1.000  | 0.808  | 0.830  | 0.202  |
| 0.104  | -0.670 | -0.883 | 0.808  | 1.000  | 0.966  | 0.407  |
| 0.031  | -0.694 | -0.847 | 0.830  | 0.966  | 1.000  | 0.497  |
| -0.282 | -0.513 | -0.143 | 0.202  | 0.407  | 0.497  | 1.000  |
| 0.260  | -0.364 | -0.662 | 0.457  | 0.730  | 0.529  | 0.023  |
| 0.074  | -0.664 | -0.881 | 0.854  | 0.969  | 0.992  | 0.380  |
| -0.061 | 0.653  | 0.856  | -0.794 | -0.968 | -0.955 | -0.502 |
| -0.566 | -0.140 | 0.323  | -0.040 | -0.062 | 0.017  | 0.558  |
| -0.513 | -0.074 | 0.458  | -0.215 | -0.188 | -0.098 | 0.591  |
| -0.308 | -0.345 | -0.151 | 0.302  | 0.398  | 0.454  | 0.735  |
| -0.494 | 0.040  | 0.138  | 0.156  | 0.097  | 0.143  | 0.560  |
| -0.651 | 0.019  | 0.552  | -0.237 | -0.251 | -0.175 | 0.506  |
| 0.138  | 0.221  | 0.177  | -0.243 | -0.209 | -0.200 | -0.270 |
| 0.298  | -0.237 | -0.677 | 0.541  | 0.541  | 0.525  | -0.286 |
| -0.264 | 0.266  | 0.671  | -0.570 | -0.617 | -0.594 | -0.256 |
| -0.045 | -0.116 | 0.400  | -0.491 | -0.345 | -0.324 | -0.111 |
| 0.465  | -0.253 | -0.607 | 0.366  | 0.456  | 0.436  | -0.229 |
| 0.189  | 0.213  | 0.016  | -0.082 | -0.127 | -0.097 | -0.282 |
| 0.208  | 0.171  | -0.486 | 0.578  | 0.356  | 0.371  | -0.213 |
| -0.397 | 0.371  | 0.661  | -0.382 | -0.589 | -0.528 | -0.200 |
| -0.022 | 0.113  | 0.293  | -0.169 | -0.207 | -0.192 | -0.125 |
| 0.467  | 0.098  | -0.433 | 0.312  | 0.271  | 0.253  | -0.199 |

| Hemicellulose | Cellulose | RFV    | NU     | PU     | KU     | CaU    |
|---------------|-----------|--------|--------|--------|--------|--------|
| 0.066         | 0.328     | -0.456 | 0.834  | 0.804  | 0.981  | 0.922  |
| -0.497        | -0.604    | 0.663  | 0.162  | 0.196  | -0.338 | -0.202 |
| 0.613         | 0.459     | -0.461 | -0.389 | -0.559 | -0.133 | -0.269 |
| -0.508        | -0.716    | 0.704  | 0.389  | 0.375  | -0.207 | -0.022 |
| 0.196         | 0.302     | -0.253 | -0.273 | -0.270 | 0.003  | 0.037  |
| -0.472        | -0.718    | 0.625  | 0.493  | 0.645  | 0.132  | 0.243  |
| 0.260         | 0.074     | -0.061 | -0.566 | -0.513 | -0.308 | -0.494 |
| -0.364        | -0.664    | 0.653  | -0.140 | -0.074 | -0.345 | 0.040  |
| -0.662        | -0.881    | 0.856  | 0.323  | 0.458  | -0.151 | 0.138  |
| 0.457         | 0.854     | -0.794 | -0.040 | -0.215 | 0.302  | 0.156  |
| 0.730         | 0.969     | -0.968 | -0.062 | -0.188 | 0.398  | 0.097  |
| 0.529         | 0.992     | -0.955 | 0.017  | -0.098 | 0.454  | 0.143  |
| 0.023         | 0.380     | -0.502 | 0.558  | 0.591  | 0.735  | 0.560  |
| 1.000         | 0.560     | -0.653 | -0.251 | -0.361 | 0.107  | -0.060 |
| 0.560         | 1.000     | -0.943 | -0.065 | -0.193 | 0.372  | 0.067  |
| -0.653        | -0.943    | 1.000  | -0.051 | 0.084  | -0.503 | -0.208 |
| -0.251        | -0.065    | -0.051 | 1.000  | 0.934  | 0.791  | 0.840  |
| -0.361        | -0.193    | 0.084  | 0.934  | 1.000  | 0.772  | 0.824  |
| 0.107         | 0.372     | -0.503 | 0.791  | 0.772  | 1.000  | 0.891  |
| -0.060        | 0.067     | -0.208 | 0.840  | 0.824  | 0.891  | 1.000  |
| -0.362        | -0.263    | 0.148  | 0.909  | 0.957  | 0.718  | 0.858  |
| -0.158        | -0.173    | 0.264  | -0.131 | -0.056 | -0.247 | -0.242 |
| 0.389         | 0.603     | -0.462 | -0.475 | -0.631 | -0.280 | -0.453 |
| -0.456        | -0.594    | 0.639  | 0.234  | 0.248  | -0.295 | -0.143 |
| -0.276        | -0.328    | 0.387  | 0.172  | 0.184  | -0.230 | -0.287 |
| 0.345         | 0.499     | -0.391 | -0.263 | -0.389 | -0.140 | -0.359 |
| -0.161        | -0.061    | 0.167  | -0.169 | -0.168 | -0.317 | -0.327 |
| 0.189         | 0.427     | -0.294 | -0.331 | -0.449 | -0.230 | -0.236 |
| -0.538        | -0.532    | 0.590  | 0.205  | 0.259  | -0.259 | -0.059 |
| -0.172        | -0.186    | 0.344  | -0.116 | -0.032 | -0.356 | -0.307 |
| 0.221         | 0.298     | -0.205 | -0.176 | -0.242 | -0.132 | -0.219 |

| MgU    | NUtE   | PUtE   | KUtE   | CaUtE  | MgUtE  | NHI    |
|--------|--------|--------|--------|--------|--------|--------|
| 0.786  | -0.285 | -0.320 | -0.238 | -0.221 | -0.225 | -0.356 |
| 0.147  | 0.713  | -0.070 | 0.963  | 0.874  | 0.141  | 0.686  |
| -0.609 | -0.306 | 0.457  | -0.491 | -0.351 | 0.403  | -0.179 |
| 0.381  | 0.070  | -0.488 | 0.777  | 0.640  | -0.297 | 0.049  |
| -0.201 | -0.241 | 0.119  | -0.523 | -0.608 | -0.184 | -0.191 |
| 0.613  | 0.089  | -0.710 | 0.553  | 0.487  | -0.443 | -0.066 |
| -0.651 | 0.138  | 0.298  | -0.264 | -0.045 | 0.465  | 0.189  |
| 0.019  | 0.221  | -0.237 | 0.266  | -0.116 | -0.253 | 0.213  |
| 0.552  | 0.177  | -0.677 | 0.671  | 0.400  | -0.607 | 0.016  |
| -0.237 | -0.243 | 0.541  | -0.570 | -0.491 | 0.366  | -0.082 |
| -0.251 | -0.209 | 0.541  | -0.617 | -0.345 | 0.456  | -0.127 |
| -0.175 | -0.200 | 0.525  | -0.594 | -0.324 | 0.436  | -0.097 |
| 0.506  | -0.270 | -0.286 | -0.256 | -0.111 | -0.229 | -0.282 |
| -0.362 | -0.158 | 0.389  | -0.456 | -0.276 | 0.345  | -0.161 |
| -0.263 | -0.173 | 0.603  | -0.594 | -0.328 | 0.499  | -0.061 |
| 0.148  | 0.264  | -0.462 | 0.639  | 0.387  | -0.391 | 0.167  |
| 0.909  | -0.131 | -0.475 | 0.234  | 0.172  | -0.263 | -0.169 |
| 0.957  | -0.056 | -0.631 | 0.248  | 0.184  | -0.389 | -0.168 |
| 0.718  | -0.247 | -0.280 | -0.295 | -0.230 | -0.140 | -0.317 |
| 0.858  | -0.242 | -0.453 | -0.143 | -0.287 | -0.359 | -0.327 |
| 1.000  | -0.121 | -0.669 | 0.227  | 0.071  | -0.520 | -0.258 |
| -0.121 | 1.000  | 0.348  | 0.623  | 0.639  | 0.473  | 0.879  |
| -0.669 | 0.348  | 1.000  | -0.121 | 0.055  | 0.868  | 0.507  |
| 0.227  | 0.623  | -0.121 | 1.000  | 0.887  | 0.041  | 0.583  |
| 0.071  | 0.639  | 0.055  | 0.887  | 1.000  | 0.298  | 0.617  |
| -0.520 | 0.473  | 0.868  | 0.041  | 0.298  | 1.000  | 0.604  |
| -0.258 | 0.879  | 0.507  | 0.583  | 0.617  | 0.604  | 1.000  |
| -0.460 | 0.354  | 0.630  | -0.051 | -0.068 | 0.522  | 0.494  |
| 0.267  | 0.593  | -0.155 | 0.885  | 0.682  | -0.084 | 0.566  |
| -0.059 | 0.428  | 0.020  | 0.537  | 0.521  | 0.099  | 0.414  |
| -0.368 | 0.545  | 0.579  | 0.163  | 0.280  | 0.770  | 0.665  |

| PHI    | KHI    | CaHI   | MgHI   |
|--------|--------|--------|--------|
| -0.279 | -0.193 | -0.347 | -0.232 |
| 0.061  | 0.850  | 0.581  | 0.317  |
| 0.206  | -0.610 | -0.309 | 0.200  |
| -0.342 | 0.615  | 0.400  | -0.147 |
| 0.322  | -0.330 | -0.029 | -0.081 |
| -0.777 | 0.408  | 0.095  | -0.424 |
| 0.208  | -0.397 | -0.022 | 0.467  |
| 0.171  | 0.371  | 0.113  | 0.098  |
| -0.486 | 0.661  | 0.293  | -0.433 |
| 0.578  | -0.382 | -0.169 | 0.312  |
| 0.356  | -0.589 | -0.207 | 0.271  |
| 0.371  | -0.528 | -0.192 | 0.253  |
| -0.213 | -0.200 | -0.125 | -0.199 |
| 0.189  | -0.538 | -0.172 | 0.221  |
| 0.427  | -0.532 | -0.186 | 0.298  |
| -0.294 | 0.590  | 0.344  | -0.205 |
| -0.331 | 0.205  | -0.116 | -0.176 |
| -0.449 | 0.259  | -0.032 | -0.242 |
| -0.230 | -0.259 | -0.356 | -0.132 |
| -0.236 | -0.059 | -0.307 | -0.219 |
| -0.460 | 0.267  | -0.059 | -0.368 |
| 0.354  | 0.593  | 0.428  | 0.545  |
| 0.630  | -0.155 | 0.020  | 0.579  |
| -0.051 | 0.885  | 0.537  | 0.163  |
| -0.068 | 0.682  | 0.521  | 0.280  |
| 0.522  | -0.084 | 0.099  | 0.770  |
| 0.494  | 0.566  | 0.414  | 0.665  |
| 1.000  | 0.112  | 0.355  | 0.768  |
| 0.112  | 1.000  | 0.575  | 0.162  |
| 0.355  | 0.575  | 1.000  | 0.427  |
| 0.768  | 0.162  | 0.427  | 1.000  |

|               | Straw yield | HI    | Ash   | CP    | CF    | P     |
|---------------|-------------|-------|-------|-------|-------|-------|
| Straw yield   | 0.000       | 0.107 | 0.333 | 0.506 | 0.923 | 0.378 |
| HI            | 0.107       | 0.000 | 0.011 | 0.000 | 0.007 | 0.007 |
| Ash           | 0.333       | 0.011 | 0.000 | 0.042 | 0.348 | 0.006 |
| CP            | 0.506       | 0.000 | 0.042 | 0.000 | 0.007 | 0.000 |
| CF            | 0.923       | 0.007 | 0.348 | 0.007 | 0.000 | 0.006 |
| P             | 0.378       | 0.007 | 0.006 | 0.000 | 0.006 | 0.000 |
| K             | 0.012       | 0.684 | 0.011 | 0.139 | 0.909 | 0.184 |
| Ca            | 0.084       | 0.082 | 0.436 | 0.263 | 0.641 | 0.568 |
| Mg            | 0.773       | 0.001 | 0.000 | 0.000 | 0.124 | 0.000 |
| GF            | 0.159       | 0.001 | 0.005 | 0.000 | 0.013 | 0.000 |
| NDF           | 0.071       | 0.000 | 0.006 | 0.000 | 0.118 | 0.000 |
| ADF           | 0.032       | 0.001 | 0.035 | 0.000 | 0.117 | 0.000 |
| ADL           | 0.000       | 0.137 | 0.411 | 0.474 | 0.382 | 0.561 |
| Hemicellulose | 0.743       | 0.008 | 0.001 | 0.007 | 0.326 | 0.013 |
| Cellulose     | 0.095       | 0.001 | 0.016 | 0.000 | 0.125 | 0.000 |
| RFV           | 0.017       | 0.000 | 0.016 | 0.000 | 0.203 | 0.000 |
| NU            | 0.000       | 0.419 | 0.045 | 0.045 | 0.169 | 0.009 |
| PU            | 0.000       | 0.327 | 0.002 | 0.054 | 0.173 | 0.000 |
| KU            | 0.000       | 0.085 | 0.508 | 0.300 | 0.986 | 0.513 |
| CaU           | 0.000       | 0.312 | 0.175 | 0.914 | 0.856 | 0.223 |
| MgU           | 0.000       | 0.463 | 0.001 | 0.050 | 0.315 | 0.001 |
| NUtE          | 0.150       | 0.000 | 0.121 | 0.728 | 0.225 | 0.659 |
| PUtE          | 0.104       | 0.730 | 0.017 | 0.010 | 0.554 | 0.000 |
| KUtE          | 0.232       | 0.000 | 0.009 | 0.000 | 0.005 | 0.003 |
| CaUtE         | 0.269       | 0.000 | 0.072 | 0.000 | 0.001 | 0.010 |
| MgUtE         | 0.258       | 0.483 | 0.037 | 0.133 | 0.358 | 0.021 |
| NHI           | 0.068       | 0.000 | 0.372 | 0.807 | 0.339 | 0.745 |
| PHI           | 0.159       | 0.762 | 0.302 | 0.081 | 0.101 | 0.000 |
| KHI           | 0.335       | 0.000 | 0.001 | 0.001 | 0.092 | 0.035 |
| CaHI          | 0.076       | 0.001 | 0.117 | 0.039 | 0.886 | 0.638 |
| MgHI          | 0.245       | 0.107 | 0.317 | 0.464 | 0.689 | 0.027 |

| K     | Ca    | Mg    | GF    | NDF   | ADF   | ADL   |
|-------|-------|-------|-------|-------|-------|-------|
| 0.012 | 0.084 | 0.773 | 0.159 | 0.071 | 0.032 | 0.000 |
| 0.684 | 0.082 | 0.001 | 0.001 | 0.000 | 0.001 | 0.137 |
| 0.011 | 0.436 | 0.000 | 0.005 | 0.006 | 0.035 | 0.411 |
| 0.139 | 0.263 | 0.000 | 0.000 | 0.000 | 0.000 | 0.474 |
| 0.909 | 0.641 | 0.124 | 0.013 | 0.118 | 0.117 | 0.382 |
| 0.184 | 0.568 | 0.000 | 0.000 | 0.000 | 0.000 | 0.561 |
| 0.000 | 0.639 | 0.019 | 0.836 | 0.607 | 0.878 | 0.153 |
| 0.639 | 0.000 | 0.019 | 0.106 | 0.000 | 0.000 | 0.006 |
| 0.019 | 0.019 | 0.000 | 0.000 | 0.000 | 0.000 | 0.476 |
| 0.836 | 0.106 | 0.000 | 0.000 | 0.000 | 0.000 | 0.313 |
| 0.607 | 0.000 | 0.000 | 0.000 | 0.000 | 0.000 | 0.035 |
| 0.878 | 0.000 | 0.000 | 0.000 | 0.000 | 0.000 | 0.008 |
| 0.153 | 0.006 | 0.476 | 0.313 | 0.035 | 0.008 | 0.000 |
| 0.191 | 0.062 | 0.000 | 0.016 | 0.000 | 0.005 | 0.910 |
| 0.712 | 0.000 | 0.000 | 0.000 | 0.000 | 0.000 | 0.050 |
| 0.764 | 0.000 | 0.000 | 0.000 | 0.000 | 0.000 | 0.008 |
| 0.002 | 0.487 | 0.101 | 0.844 | 0.758 | 0.932 | 0.003 |
| 0.006 | 0.712 | 0.016 | 0.281 | 0.347 | 0.628 | 0.001 |
| 0.118 | 0.078 | 0.451 | 0.125 | 0.040 | 0.017 | 0.000 |
| 0.009 | 0.843 | 0.494 | 0.437 | 0.630 | 0.477 | 0.002 |
| 0.000 | 0.925 | 0.003 | 0.234 | 0.206 | 0.382 | 0.007 |
| 0.491 | 0.267 | 0.378 | 0.221 | 0.295 | 0.317 | 0.174 |
| 0.131 | 0.234 | 0.000 | 0.004 | 0.004 | 0.005 | 0.148 |
| 0.184 | 0.180 | 0.000 | 0.002 | 0.001 | 0.001 | 0.198 |
| 0.824 | 0.564 | 0.039 | 0.009 | 0.078 | 0.099 | 0.580 |
| 0.014 | 0.203 | 0.001 | 0.061 | 0.017 | 0.023 | 0.252 |
| 0.345 | 0.287 | 0.936 | 0.683 | 0.527 | 0.630 | 0.154 |
| 0.297 | 0.392 | 0.010 | 0.002 | 0.068 | 0.057 | 0.286 |
| 0.040 | 0.056 | 0.000 | 0.049 | 0.001 | 0.005 | 0.317 |
| 0.913 | 0.573 | 0.138 | 0.401 | 0.301 | 0.337 | 0.533 |
| 0.014 | 0.628 | 0.024 | 0.113 | 0.172 | 0.203 | 0.321 |

| Hemicellulose | Cellulose | RFV   | NU    | PU    | KU    | CaU   |
|---------------|-----------|-------|-------|-------|-------|-------|
| 0.743         | 0.095     | 0.017 | 0.000 | 0.000 | 0.000 | 0.000 |
| 0.008         | 0.001     | 0.000 | 0.419 | 0.327 | 0.085 | 0.312 |
| 0.001         | 0.016     | 0.016 | 0.045 | 0.002 | 0.508 | 0.175 |
| 0.007         | 0.000     | 0.000 | 0.045 | 0.054 | 0.300 | 0.914 |
| 0.326         | 0.125     | 0.203 | 0.169 | 0.173 | 0.986 | 0.856 |
| 0.013         | 0.000     | 0.000 | 0.009 | 0.000 | 0.513 | 0.223 |
| 0.191         | 0.712     | 0.764 | 0.002 | 0.006 | 0.118 | 0.009 |
| 0.062         | 0.000     | 0.000 | 0.487 | 0.712 | 0.078 | 0.843 |
| 0.000         | 0.000     | 0.000 | 0.101 | 0.016 | 0.451 | 0.494 |
| 0.016         | 0.000     | 0.000 | 0.844 | 0.281 | 0.125 | 0.437 |
| 0.000         | 0.000     | 0.000 | 0.758 | 0.347 | 0.040 | 0.630 |
| 0.005         | 0.000     | 0.000 | 0.932 | 0.628 | 0.017 | 0.477 |
| 0.910         | 0.050     | 0.008 | 0.003 | 0.001 | 0.000 | 0.002 |
| 0.000         | 0.002     | 0.000 | 0.207 | 0.064 | 0.596 | 0.766 |
| 0.002         | 0.000     | 0.000 | 0.747 | 0.334 | 0.056 | 0.739 |
| 0.000         | 0.000     | 0.000 | 0.802 | 0.679 | 0.007 | 0.297 |
| 0.207         | 0.747     | 0.802 | 0.000 | 0.000 | 0.000 | 0.000 |
| 0.064         | 0.334     | 0.679 | 0.000 | 0.000 | 0.000 | 0.000 |
| 0.596         | 0.056     | 0.007 | 0.000 | 0.000 | 0.000 | 0.000 |
| 0.766         | 0.739     | 0.297 | 0.000 | 0.000 | 0.000 | 0.000 |
| 0.063         | 0.185     | 0.460 | 0.000 | 0.000 | 0.000 | 0.000 |
| 0.432         | 0.387     | 0.183 | 0.516 | 0.783 | 0.213 | 0.223 |
| 0.045         | 0.001     | 0.015 | 0.012 | 0.000 | 0.157 | 0.018 |
| 0.017         | 0.001     | 0.000 | 0.240 | 0.212 | 0.135 | 0.478 |
| 0.164         | 0.095     | 0.046 | 0.391 | 0.359 | 0.249 | 0.146 |
| 0.078         | 0.008     | 0.044 | 0.185 | 0.045 | 0.487 | 0.066 |
| 0.421         | 0.764     | 0.406 | 0.399 | 0.403 | 0.107 | 0.096 |
| 0.346         | 0.026     | 0.137 | 0.091 | 0.019 | 0.248 | 0.236 |
| 0.004         | 0.004     | 0.001 | 0.306 | 0.193 | 0.193 | 0.772 |
| 0.392         | 0.354     | 0.079 | 0.565 | 0.873 | 0.068 | 0.119 |
| 0.267         | 0.131     | 0.305 | 0.380 | 0.225 | 0.511 | 0.273 |

| MgU   | NUtE  | PUtE  | KUtE  | CaUtE | MgUtE | NHI   |
|-------|-------|-------|-------|-------|-------|-------|
| 0.000 | 0.150 | 0.104 | 0.232 | 0.269 | 0.258 | 0.068 |
| 0.463 | 0.000 | 0.730 | 0.000 | 0.000 | 0.483 | 0.000 |
| 0.001 | 0.121 | 0.017 | 0.009 | 0.072 | 0.037 | 0.372 |
| 0.050 | 0.728 | 0.010 | 0.000 | 0.000 | 0.133 | 0.807 |
| 0.315 | 0.225 | 0.554 | 0.005 | 0.001 | 0.358 | 0.339 |
| 0.001 | 0.659 | 0.000 | 0.003 | 0.010 | 0.021 | 0.745 |
| 0.000 | 0.491 | 0.131 | 0.184 | 0.824 | 0.014 | 0.345 |
| 0.925 | 0.267 | 0.234 | 0.180 | 0.564 | 0.203 | 0.287 |
| 0.003 | 0.378 | 0.000 | 0.000 | 0.039 | 0.001 | 0.936 |
| 0.234 | 0.221 | 0.004 | 0.002 | 0.009 | 0.061 | 0.683 |
| 0.206 | 0.295 | 0.004 | 0.001 | 0.078 | 0.017 | 0.527 |
| 0.382 | 0.317 | 0.005 | 0.001 | 0.099 | 0.023 | 0.630 |
| 0.007 | 0.174 | 0.148 | 0.198 | 0.580 | 0.252 | 0.154 |
| 0.063 | 0.432 | 0.045 | 0.017 | 0.164 | 0.078 | 0.421 |
| 0.185 | 0.387 | 0.001 | 0.001 | 0.095 | 0.008 | 0.764 |
| 0.460 | 0.183 | 0.015 | 0.000 | 0.046 | 0.044 | 0.406 |
| 0.000 | 0.516 | 0.012 | 0.240 | 0.391 | 0.185 | 0.399 |
| 0.000 | 0.783 | 0.000 | 0.212 | 0.359 | 0.045 | 0.403 |
| 0.000 | 0.213 | 0.157 | 0.135 | 0.249 | 0.487 | 0.107 |
| 0.000 | 0.223 | 0.018 | 0.478 | 0.146 | 0.066 | 0.096 |
| 0.000 | 0.546 | 0.000 | 0.254 | 0.726 | 0.005 | 0.193 |
| 0.546 | 0.000 | 0.075 | 0.001 | 0.000 | 0.013 | 0.000 |
| 0.000 | 0.075 | 0.000 | 0.547 | 0.783 | 0.000 | 0.007 |
| 0.254 | 0.001 | 0.547 | 0.000 | 0.000 | 0.838 | 0.001 |
| 0.726 | 0.000 | 0.783 | 0.000 | 0.000 | 0.131 | 0.001 |
| 0.005 | 0.013 | 0.000 | 0.838 | 0.131 | 0.000 | 0.001 |
| 0.193 | 0.000 | 0.007 | 0.001 | 0.001 | 0.001 | 0.000 |
| 0.016 | 0.070 | 0.000 | 0.800 | 0.736 | 0.005 | 0.009 |
| 0.179 | 0.001 | 0.440 | 0.000 | 0.000 | 0.678 | 0.002 |
| 0.771 | 0.026 | 0.922 | 0.004 | 0.005 | 0.624 | 0.032 |
| 0.059 | 0.003 | 0.002 | 0.417 | 0.158 | 0.000 | 0.000 |



| PHI   | KHI   | CaHI  | MgHI  |
|-------|-------|-------|-------|
| 0.159 | 0.335 | 0.076 | 0.245 |
| 0.762 | 0.000 | 0.001 | 0.107 |
| 0.302 | 0.001 | 0.117 | 0.317 |
| 0.081 | 0.001 | 0.039 | 0.464 |
| 0.101 | 0.092 | 0.886 | 0.689 |
| 0.000 | 0.035 | 0.638 | 0.027 |
| 0.297 | 0.040 | 0.913 | 0.014 |
| 0.392 | 0.056 | 0.573 | 0.628 |
| 0.010 | 0.000 | 0.138 | 0.024 |
| 0.002 | 0.049 | 0.401 | 0.113 |
| 0.068 | 0.001 | 0.301 | 0.172 |
| 0.057 | 0.005 | 0.337 | 0.203 |
| 0.286 | 0.317 | 0.533 | 0.321 |
| 0.346 | 0.004 | 0.392 | 0.267 |
| 0.026 | 0.004 | 0.354 | 0.131 |
| 0.137 | 0.001 | 0.079 | 0.305 |
| 0.091 | 0.306 | 0.565 | 0.380 |
| 0.019 | 0.193 | 0.873 | 0.225 |
| 0.248 | 0.193 | 0.068 | 0.511 |
| 0.236 | 0.772 | 0.119 | 0.273 |
| 0.016 | 0.179 | 0.771 | 0.059 |
| 0.070 | 0.001 | 0.026 | 0.003 |
| 0.000 | 0.440 | 0.922 | 0.002 |
| 0.800 | 0.000 | 0.004 | 0.417 |
| 0.736 | 0.000 | 0.005 | 0.158 |
| 0.005 | 0.678 | 0.624 | 0.000 |
| 0.009 | 0.002 | 0.032 | 0.000 |
| 0.000 | 0.578 | 0.070 | 0.000 |
| 0.578 | 0.000 | 0.002 | 0.420 |
| 0.070 | 0.002 | 0.000 | 0.027 |
| 0.000 | 0.420 | 0.027 | 0.000 |

|               | Straw yield | HI     | Ash    | CP     | CF     | P      |
|---------------|-------------|--------|--------|--------|--------|--------|
| Straw yield   | 1.000       | -0.314 | -0.561 | 0.570  | 0.031  | 0.436  |
| HI            | -0.314      | 1.000  | -0.085 | 0.030  | 0.135  | 0.069  |
| Ash           | -0.561      | -0.085 | 1.000  | -0.223 | -0.396 | -0.354 |
| CP            | 0.570       | 0.030  | -0.223 | 1.000  | -0.182 | 0.240  |
| CF            | 0.031       | 0.135  | -0.396 | -0.182 | 1.000  | 0.001  |
| P             | 0.436       | 0.069  | -0.354 | 0.240  | 0.001  | 1.000  |
| K             | -0.369      | 0.006  | 0.674  | -0.423 | 0.059  | -0.208 |
| Ca            | -0.627      | -0.012 | 0.561  | -0.564 | 0.020  | -0.429 |
| Mg            | 0.592       | 0.123  | -0.567 | 0.458  | 0.051  | 0.646  |
| GF            | -0.409      | -0.203 | 0.213  | -0.373 | -0.173 | -0.283 |
| NDF           | -0.357      | -0.095 | 0.260  | -0.184 | -0.386 | -0.274 |
| ADF           | -0.399      | -0.087 | 0.234  | -0.284 | -0.379 | -0.324 |
| ADL           | -0.053      | -0.115 | -0.156 | 0.098  | -0.338 | 0.035  |
| Hemicellulose | -0.125      | -0.082 | 0.230  | 0.132  | -0.261 | -0.051 |
| Cellulose     | -0.420      | -0.074 | 0.280  | -0.326 | -0.346 | -0.357 |
| RFV           | 0.379       | 0.088  | -0.250 | 0.210  | 0.374  | 0.335  |
| NU            | 0.811       | 0.144  | -0.478 | 0.858  | -0.005 | 0.379  |
| PU            | 0.709       | 0.272  | -0.571 | 0.476  | 0.126  | 0.811  |
| KU            | 0.892       | -0.148 | -0.344 | 0.427  | 0.065  | 0.473  |
| CaU           | 0.611       | -0.303 | -0.210 | 0.163  | 0.071  | 0.236  |
| MgU           | 0.835       | 0.008  | -0.642 | 0.560  | 0.090  | 0.643  |
| NUtE          | -0.492      | 0.743  | -0.030 | -0.582 | 0.211  | -0.027 |
| PUtE          | -0.606      | 0.444  | 0.324  | -0.284 | 0.127  | -0.807 |
| KUtE          | -0.133      | 0.875  | -0.378 | 0.230  | 0.101  | 0.086  |
| CaUtE         | 0.114       | 0.814  | -0.370 | 0.362  | 0.047  | 0.286  |
| MgUtE         | -0.802      | 0.508  | 0.474  | -0.435 | 0.096  | -0.581 |
| NHI           | -0.757      | 0.625  | 0.261  | -0.719 | 0.188  | -0.250 |
| PHI           | -0.507      | 0.632  | 0.203  | -0.143 | 0.196  | -0.688 |
| KHI           | -0.083      | 0.868  | -0.341 | 0.168  | 0.070  | 0.337  |
| CaHI          | 0.056       | 0.618  | -0.289 | 0.485  | -0.005 | 0.167  |
| MgHI          | -0.627      | 0.656  | 0.309  | -0.273 | 0.080  | -0.353 |

| K      | Ca     | Mg     | GF     | NDF    | ADF    | ADL    |
|--------|--------|--------|--------|--------|--------|--------|
| -0.369 | -0.627 | 0.592  | -0.409 | -0.357 | -0.399 | -0.053 |
| 0.006  | -0.012 | 0.123  | -0.203 | -0.095 | -0.087 | -0.115 |
| 0.674  | 0.561  | -0.567 | 0.213  | 0.260  | 0.234  | -0.156 |
| -0.423 | -0.564 | 0.458  | -0.373 | -0.184 | -0.284 | 0.098  |
| 0.059  | 0.020  | 0.051  | -0.173 | -0.386 | -0.379 | -0.338 |
| -0.208 | -0.429 | 0.646  | -0.283 | -0.274 | -0.324 | 0.035  |
| 1.000  | 0.503  | -0.521 | 0.022  | -0.138 | -0.109 | -0.594 |
| 0.503  | 1.000  | -0.430 | 0.029  | -0.105 | -0.029 | -0.314 |
| -0.521 | -0.430 | 1.000  | -0.603 | -0.513 | -0.566 | 0.197  |
| 0.022  | 0.029  | -0.603 | 1.000  | 0.864  | 0.881  | 0.347  |
| -0.138 | -0.105 | -0.513 | 0.864  | 1.000  | 0.961  | 0.582  |
| -0.109 | -0.029 | -0.566 | 0.881  | 0.961  | 1.000  | 0.514  |
| -0.594 | -0.314 | 0.197  | 0.347  | 0.582  | 0.514  | 1.000  |
| -0.158 | -0.254 | -0.194 | 0.505  | 0.731  | 0.515  | 0.537  |
| -0.008 | 0.025  | -0.648 | 0.890  | 0.933  | 0.987  | 0.371  |
| 0.131  | 0.084  | 0.533  | -0.867 | -0.990 | -0.978 | -0.578 |
| -0.405 | -0.651 | 0.621  | -0.512 | -0.366 | -0.428 | -0.071 |
| -0.276 | -0.624 | 0.723  | -0.501 | -0.449 | -0.488 | -0.131 |
| 0.033  | -0.483 | 0.458  | -0.462 | -0.469 | -0.495 | -0.360 |
| -0.036 | 0.204  | 0.431  | -0.521 | -0.595 | -0.572 | -0.375 |
| -0.469 | -0.582 | 0.924  | -0.612 | -0.537 | -0.582 | 0.053  |
| 0.197  | 0.222  | -0.133 | 0.056  | 0.034  | 0.091  | -0.103 |
| 0.229  | 0.537  | -0.496 | 0.071  | 0.105  | 0.158  | -0.106 |
| -0.461 | -0.241 | 0.298  | -0.145 | 0.029  | 0.018  | 0.199  |
| -0.262 | -0.559 | 0.299  | -0.180 | -0.008 | -0.023 | 0.079  |
| 0.470  | 0.476  | -0.745 | 0.381  | 0.330  | 0.377  | -0.192 |
| 0.391  | 0.518  | -0.339 | 0.197  | 0.130  | 0.203  | -0.155 |
| 0.234  | 0.274  | -0.404 | 0.010  | 0.041  | 0.076  | -0.222 |
| -0.360 | -0.259 | 0.338  | -0.141 | -0.015 | -0.013 | 0.051  |
| -0.334 | -0.491 | 0.232  | -0.152 | 0.010  | -0.019 | 0.105  |
| 0.400  | 0.202  | -0.616 | 0.353  | 0.326  | 0.366  | -0.247 |

| Hemicellulose | Cellulose | RFV    | NU     | PU     | KU     | CaU    |
|---------------|-----------|--------|--------|--------|--------|--------|
| -0.125        | -0.420    | 0.379  | 0.811  | 0.709  | 0.892  | 0.611  |
| -0.082        | -0.074    | 0.088  | 0.144  | 0.272  | -0.148 | -0.303 |
| 0.230         | 0.280     | -0.250 | -0.478 | -0.571 | -0.344 | -0.210 |
| 0.132         | -0.326    | 0.210  | 0.858  | 0.476  | 0.427  | 0.163  |
| -0.261        | -0.346    | 0.374  | -0.005 | 0.126  | 0.065  | 0.071  |
| -0.051        | -0.357    | 0.335  | 0.379  | 0.811  | 0.473  | 0.236  |
| -0.158        | -0.008    | 0.131  | -0.405 | -0.276 | 0.033  | -0.036 |
| -0.254        | 0.025     | 0.084  | -0.651 | -0.624 | -0.483 | 0.204  |
| -0.194        | -0.648    | 0.533  | 0.621  | 0.723  | 0.458  | 0.431  |
| 0.505         | 0.890     | -0.867 | -0.512 | -0.501 | -0.462 | -0.521 |
| 0.731         | 0.933     | -0.990 | -0.366 | -0.449 | -0.469 | -0.595 |
| 0.515         | 0.987     | -0.978 | -0.428 | -0.488 | -0.495 | -0.572 |
| 0.537         | 0.371     | -0.578 | -0.071 | -0.131 | -0.360 | -0.375 |
| 1.000         | 0.458     | -0.659 | -0.077 | -0.188 | -0.232 | -0.437 |
| 0.458         | 1.000     | -0.951 | -0.449 | -0.502 | -0.467 | -0.548 |
| -0.659        | -0.951    | 1.000  | 0.388  | 0.489  | 0.492  | 0.609  |
| -0.077        | -0.449    | 0.388  | 1.000  | 0.760  | 0.739  | 0.395  |
| -0.188        | -0.502    | 0.489  | 0.760  | 1.000  | 0.761  | 0.360  |
| -0.232        | -0.467    | 0.492  | 0.739  | 0.761  | 1.000  | 0.617  |
| -0.437        | -0.548    | 0.609  | 0.395  | 0.360  | 0.617  | 1.000  |
| -0.231        | -0.639    | 0.561  | 0.800  | 0.847  | 0.727  | 0.539  |
| -0.121        | 0.117     | -0.052 | -0.369 | 0.022  | -0.280 | -0.323 |
| -0.065        | 0.189     | -0.156 | -0.342 | -0.603 | -0.535 | -0.276 |
| 0.043         | -0.017    | -0.032 | 0.300  | 0.311  | -0.185 | -0.287 |
| 0.032         | -0.039    | 0.006  | 0.502  | 0.577  | 0.181  | -0.340 |
| 0.094         | 0.442     | -0.355 | -0.532 | -0.548 | -0.602 | -0.569 |
| -0.100        | 0.248     | -0.155 | -0.605 | -0.319 | -0.539 | -0.377 |
| -0.060        | 0.122     | -0.089 | -0.155 | -0.364 | -0.382 | -0.393 |
| -0.016        | -0.023    | 0.019  | 0.289  | 0.475  | -0.045 | -0.218 |
| 0.079         | -0.042    | -0.014 | 0.425  | 0.380  | 0.033  | -0.327 |
| 0.107         | 0.441     | -0.347 | -0.295 | -0.243 | -0.391 | -0.588 |

| Hemicellulose | Cellulose | RFV    | NU     | PU     | KU     | CaU    |
|---------------|-----------|--------|--------|--------|--------|--------|
| -0.125        | -0.420    | 0.379  | 0.811  | 0.709  | 0.892  | 0.611  |
| -0.082        | -0.074    | 0.088  | 0.144  | 0.272  | -0.148 | -0.303 |
| 0.230         | 0.280     | -0.250 | -0.478 | -0.571 | -0.344 | -0.210 |
| 0.132         | -0.326    | 0.210  | 0.858  | 0.476  | 0.427  | 0.163  |
| -0.261        | -0.346    | 0.374  | -0.005 | 0.126  | 0.065  | 0.071  |
| -0.051        | -0.357    | 0.335  | 0.379  | 0.811  | 0.473  | 0.236  |
| -0.158        | -0.008    | 0.131  | -0.405 | -0.276 | 0.033  | -0.036 |
| -0.254        | 0.025     | 0.084  | -0.651 | -0.624 | -0.483 | 0.204  |
| -0.194        | -0.648    | 0.533  | 0.621  | 0.723  | 0.458  | 0.431  |
| 0.505         | 0.890     | -0.867 | -0.512 | -0.501 | -0.462 | -0.521 |
| 0.731         | 0.933     | -0.990 | -0.366 | -0.449 | -0.469 | -0.595 |
| 0.515         | 0.987     | -0.978 | -0.428 | -0.488 | -0.495 | -0.572 |
| 0.537         | 0.371     | -0.578 | -0.071 | -0.131 | -0.360 | -0.375 |
| 1.000         | 0.458     | -0.659 | -0.077 | -0.188 | -0.232 | -0.437 |
| 0.458         | 1.000     | -0.951 | -0.449 | -0.502 | -0.467 | -0.548 |
| -0.659        | -0.951    | 1.000  | 0.388  | 0.489  | 0.492  | 0.609  |
| -0.077        | -0.449    | 0.388  | 1.000  | 0.760  | 0.739  | 0.395  |
| -0.188        | -0.502    | 0.489  | 0.760  | 1.000  | 0.761  | 0.360  |
| -0.232        | -0.467    | 0.492  | 0.739  | 0.761  | 1.000  | 0.617  |
| -0.437        | -0.548    | 0.609  | 0.395  | 0.360  | 0.617  | 1.000  |
| -0.231        | -0.639    | 0.561  | 0.800  | 0.847  | 0.727  | 0.539  |
| -0.121        | 0.117     | -0.052 | -0.369 | 0.022  | -0.280 | -0.323 |
| -0.065        | 0.189     | -0.156 | -0.342 | -0.603 | -0.535 | -0.276 |
| 0.043         | -0.017    | -0.032 | 0.300  | 0.311  | -0.185 | -0.287 |
| 0.032         | -0.039    | 0.006  | 0.502  | 0.577  | 0.181  | -0.340 |
| 0.094         | 0.442     | -0.355 | -0.532 | -0.548 | -0.602 | -0.569 |
| -0.100        | 0.248     | -0.155 | -0.605 | -0.319 | -0.539 | -0.377 |
| -0.060        | 0.122     | -0.089 | -0.155 | -0.364 | -0.382 | -0.393 |
| -0.016        | -0.023    | 0.019  | 0.289  | 0.475  | -0.045 | -0.218 |
| 0.079         | -0.042    | -0.014 | 0.425  | 0.380  | 0.033  | -0.327 |
| 0.107         | 0.441     | -0.347 | -0.295 | -0.243 | -0.391 | -0.588 |

| MgU    | NUtE   | PUtE   | KUtE   | CaUtE  | MgUtE  | NHI    |
|--------|--------|--------|--------|--------|--------|--------|
| 0.835  | -0.492 | -0.606 | -0.133 | 0.114  | -0.802 | -0.757 |
| 0.008  | 0.743  | 0.444  | 0.875  | 0.814  | 0.508  | 0.625  |
| -0.642 | -0.030 | 0.324  | -0.378 | -0.370 | 0.474  | 0.261  |
| 0.560  | -0.582 | -0.284 | 0.230  | 0.362  | -0.435 | -0.719 |
| 0.090  | 0.211  | 0.127  | 0.101  | 0.047  | 0.096  | 0.188  |
| 0.643  | -0.027 | -0.807 | 0.086  | 0.286  | -0.581 | -0.250 |
| -0.469 | 0.197  | 0.229  | -0.461 | -0.262 | 0.470  | 0.391  |
| -0.582 | 0.222  | 0.537  | -0.241 | -0.559 | 0.476  | 0.518  |
| 0.924  | -0.133 | -0.496 | 0.298  | 0.299  | -0.745 | -0.339 |
| -0.612 | 0.056  | 0.071  | -0.145 | -0.180 | 0.381  | 0.197  |
| -0.537 | 0.034  | 0.105  | 0.029  | -0.008 | 0.330  | 0.130  |
| -0.582 | 0.091  | 0.158  | 0.018  | -0.023 | 0.377  | 0.203  |
| 0.053  | -0.103 | -0.106 | 0.199  | 0.079  | -0.192 | -0.155 |
| -0.231 | -0.121 | -0.065 | 0.043  | 0.032  | 0.094  | -0.100 |
| -0.639 | 0.117  | 0.189  | -0.017 | -0.039 | 0.442  | 0.248  |
| 0.561  | -0.052 | -0.156 | -0.032 | 0.006  | -0.355 | -0.155 |
| 0.800  | -0.369 | -0.342 | 0.300  | 0.502  | -0.532 | -0.605 |
| 0.847  | 0.022  | -0.603 | 0.311  | 0.577  | -0.548 | -0.319 |
| 0.727  | -0.280 | -0.535 | -0.185 | 0.181  | -0.602 | -0.539 |
| 0.539  | -0.323 | -0.276 | -0.287 | -0.340 | -0.569 | -0.377 |
| 1.000  | -0.255 | -0.584 | 0.176  | 0.313  | -0.806 | -0.522 |
| -0.255 | 1.000  | 0.459  | 0.553  | 0.469  | 0.592  | 0.858  |
| -0.584 | 0.459  | 1.000  | 0.334  | 0.068  | 0.791  | 0.598  |
| 0.176  | 0.553  | 0.334  | 1.000  | 0.838  | 0.269  | 0.367  |
| 0.313  | 0.469  | 0.068  | 0.838  | 1.000  | 0.156  | 0.187  |
| -0.806 | 0.592  | 0.791  | 0.269  | 0.156  | 1.000  | 0.748  |
| -0.522 | 0.858  | 0.598  | 0.367  | 0.187  | 0.748  | 1.000  |
| -0.446 | 0.548  | 0.897  | 0.494  | 0.358  | 0.796  | 0.593  |
| 0.224  | 0.604  | 0.112  | 0.920  | 0.855  | 0.181  | 0.380  |
| 0.209  | 0.240  | 0.036  | 0.724  | 0.773  | 0.101  | -0.018 |
| -0.621 | 0.633  | 0.593  | 0.421  | 0.439  | 0.915  | 0.691  |

| PHI    | KHI    | CaHI   | MgHI   |
|--------|--------|--------|--------|
| -0.507 | -0.083 | 0.056  | -0.627 |
| 0.632  | 0.868  | 0.618  | 0.656  |
| 0.203  | -0.341 | -0.289 | 0.309  |
| -0.143 | 0.168  | 0.485  | -0.273 |
| 0.196  | 0.070  | -0.005 | 0.080  |
| -0.688 | 0.337  | 0.167  | -0.353 |
| 0.234  | -0.360 | -0.334 | 0.400  |
| 0.274  | -0.259 | -0.491 | 0.202  |
| -0.404 | 0.338  | 0.232  | -0.616 |
| 0.010  | -0.141 | -0.152 | 0.353  |
| 0.041  | -0.015 | 0.010  | 0.326  |
| 0.076  | -0.013 | -0.019 | 0.366  |
| -0.222 | 0.051  | 0.105  | -0.247 |
| -0.060 | -0.016 | 0.079  | 0.107  |
| 0.122  | -0.023 | -0.042 | 0.441  |
| -0.089 | 0.019  | -0.014 | -0.347 |
| -0.155 | 0.289  | 0.425  | -0.295 |
| -0.364 | 0.475  | 0.380  | -0.243 |
| -0.382 | -0.045 | 0.033  | -0.391 |
| -0.393 | -0.218 | -0.327 | -0.588 |
| -0.446 | 0.224  | 0.209  | -0.621 |
| 0.548  | 0.604  | 0.240  | 0.633  |
| 0.897  | 0.112  | 0.036  | 0.593  |
| 0.494  | 0.920  | 0.724  | 0.421  |
| 0.358  | 0.855  | 0.773  | 0.439  |
| 0.796  | 0.181  | 0.101  | 0.915  |
| 0.593  | 0.380  | -0.018 | 0.691  |
| 1.000  | 0.320  | 0.302  | 0.742  |
| 0.320  | 1.000  | 0.705  | 0.412  |
| 0.302  | 0.705  | 1.000  | 0.329  |
| 0.742  | 0.412  | 0.329  | 1.000  |

|               | Straw yield | HI    | Ash   | CP    | CF    | P     |
|---------------|-------------|-------|-------|-------|-------|-------|
| Straw yield   | 0.000       | 0.111 | 0.002 | 0.002 | 0.877 | 0.023 |
| HI            | 0.111       | 0.000 | 0.675 | 0.883 | 0.501 | 0.734 |
| Ash           | 0.002       | 0.675 | 0.000 | 0.264 | 0.041 | 0.070 |
| CP            | 0.002       | 0.883 | 0.264 | 0.000 | 0.364 | 0.227 |
| CF            | 0.877       | 0.501 | 0.041 | 0.364 | 0.000 | 0.996 |
| P             | 0.023       | 0.734 | 0.070 | 0.227 | 0.996 | 0.000 |
| K             | 0.058       | 0.975 | 0.000 | 0.028 | 0.769 | 0.298 |
| Ca            | 0.000       | 0.952 | 0.002 | 0.002 | 0.922 | 0.025 |
| Mg            | 0.001       | 0.541 | 0.002 | 0.016 | 0.802 | 0.000 |
| GF            | 0.034       | 0.309 | 0.285 | 0.055 | 0.389 | 0.153 |
| NDF           | 0.067       | 0.636 | 0.191 | 0.359 | 0.047 | 0.166 |
| ADF           | 0.039       | 0.666 | 0.241 | 0.151 | 0.051 | 0.099 |
| ADL           | 0.791       | 0.569 | 0.438 | 0.628 | 0.085 | 0.861 |
| Hemicellulose | 0.535       | 0.686 | 0.249 | 0.511 | 0.189 | 0.800 |
| Cellulose     | 0.029       | 0.715 | 0.158 | 0.097 | 0.077 | 0.068 |
| RFV           | 0.051       | 0.664 | 0.209 | 0.294 | 0.054 | 0.087 |
| NU            | 0.000       | 0.474 | 0.012 | 0.000 | 0.979 | 0.051 |
| PU            | 0.000       | 0.171 | 0.002 | 0.012 | 0.531 | 0.000 |
| KU            | 0.000       | 0.460 | 0.079 | 0.026 | 0.749 | 0.013 |
| CaU           | 0.001       | 0.124 | 0.294 | 0.416 | 0.726 | 0.237 |
| MgU           | 0.000       | 0.967 | 0.000 | 0.002 | 0.656 | 0.000 |
| NUtE          | 0.009       | 0.000 | 0.882 | 0.001 | 0.291 | 0.894 |
| PUtE          | 0.001       | 0.020 | 0.100 | 0.151 | 0.528 | 0.000 |
| KUtE          | 0.508       | 0.000 | 0.052 | 0.249 | 0.614 | 0.670 |
| CaUtE         | 0.571       | 0.000 | 0.057 | 0.064 | 0.815 | 0.148 |
| MgUtE         | 0.000       | 0.007 | 0.013 | 0.024 | 0.632 | 0.001 |
| NHI           | 0.000       | 0.000 | 0.189 | 0.000 | 0.347 | 0.209 |
| PHI           | 0.007       | 0.000 | 0.309 | 0.477 | 0.327 | 0.000 |
| KHI           | 0.682       | 0.000 | 0.082 | 0.403 | 0.729 | 0.086 |
| CaHI          | 0.781       | 0.001 | 0.144 | 0.010 | 0.980 | 0.406 |
| MgHI          | 0.000       | 0.000 | 0.117 | 0.168 | 0.693 | 0.071 |



| K     | Ca    | Mg    | GF    | NDF   | ADF   | ADL   |
|-------|-------|-------|-------|-------|-------|-------|
| 0.058 | 0.000 | 0.001 | 0.034 | 0.067 | 0.039 | 0.791 |
| 0.975 | 0.952 | 0.541 | 0.309 | 0.636 | 0.666 | 0.569 |
| 0.000 | 0.002 | 0.002 | 0.285 | 0.191 | 0.241 | 0.438 |
| 0.028 | 0.002 | 0.016 | 0.055 | 0.359 | 0.151 | 0.628 |
| 0.769 | 0.922 | 0.802 | 0.389 | 0.047 | 0.051 | 0.085 |
| 0.298 | 0.025 | 0.000 | 0.153 | 0.166 | 0.099 | 0.861 |
| 0.000 | 0.007 | 0.005 | 0.912 | 0.493 | 0.589 | 0.001 |
| 0.007 | 0.000 | 0.025 | 0.888 | 0.604 | 0.885 | 0.111 |
| 0.005 | 0.025 | 0.000 | 0.001 | 0.006 | 0.002 | 0.324 |
| 0.912 | 0.888 | 0.001 | 0.000 | 0.000 | 0.000 | 0.076 |
| 0.493 | 0.604 | 0.006 | 0.000 | 0.000 | 0.000 | 0.001 |
| 0.589 | 0.885 | 0.002 | 0.000 | 0.000 | 0.000 | 0.006 |
| 0.001 | 0.111 | 0.324 | 0.076 | 0.001 | 0.006 | 0.000 |
| 0.431 | 0.202 | 0.331 | 0.007 | 0.000 | 0.006 | 0.004 |
| 0.968 | 0.900 | 0.000 | 0.000 | 0.000 | 0.000 | 0.057 |
| 0.514 | 0.677 | 0.004 | 0.000 | 0.000 | 0.000 | 0.002 |
| 0.036 | 0.000 | 0.001 | 0.006 | 0.061 | 0.026 | 0.725 |
| 0.164 | 0.001 | 0.000 | 0.008 | 0.019 | 0.010 | 0.515 |
| 0.871 | 0.011 | 0.016 | 0.015 | 0.014 | 0.009 | 0.065 |
| 0.857 | 0.308 | 0.025 | 0.005 | 0.001 | 0.002 | 0.054 |
| 0.014 | 0.001 | 0.000 | 0.001 | 0.004 | 0.001 | 0.792 |
| 0.325 | 0.266 | 0.510 | 0.780 | 0.867 | 0.651 | 0.610 |
| 0.250 | 0.004 | 0.008 | 0.724 | 0.603 | 0.431 | 0.599 |
| 0.015 | 0.226 | 0.131 | 0.470 | 0.887 | 0.927 | 0.321 |
| 0.187 | 0.002 | 0.129 | 0.369 | 0.967 | 0.908 | 0.696 |
| 0.013 | 0.012 | 0.000 | 0.050 | 0.093 | 0.052 | 0.337 |
| 0.044 | 0.006 | 0.083 | 0.326 | 0.519 | 0.310 | 0.439 |
| 0.240 | 0.167 | 0.037 | 0.960 | 0.838 | 0.705 | 0.265 |
| 0.065 | 0.192 | 0.085 | 0.484 | 0.940 | 0.949 | 0.800 |
| 0.088 | 0.009 | 0.243 | 0.448 | 0.960 | 0.926 | 0.601 |
| 0.039 | 0.312 | 0.001 | 0.071 | 0.097 | 0.060 | 0.213 |

| Hemicellulose | Cellulose | RFV   | NU    | PU    | KU    | CaU   |
|---------------|-----------|-------|-------|-------|-------|-------|
| 0.535         | 0.029     | 0.051 | 0.000 | 0.000 | 0.000 | 0.001 |
| 0.686         | 0.715     | 0.664 | 0.474 | 0.171 | 0.460 | 0.124 |
| 0.249         | 0.158     | 0.209 | 0.012 | 0.002 | 0.079 | 0.294 |
| 0.511         | 0.097     | 0.294 | 0.000 | 0.012 | 0.026 | 0.416 |
| 0.189         | 0.077     | 0.054 | 0.979 | 0.531 | 0.749 | 0.726 |
| 0.800         | 0.068     | 0.087 | 0.051 | 0.000 | 0.013 | 0.237 |
| 0.431         | 0.968     | 0.514 | 0.036 | 0.164 | 0.871 | 0.857 |
| 0.202         | 0.900     | 0.677 | 0.000 | 0.001 | 0.011 | 0.308 |
| 0.331         | 0.000     | 0.004 | 0.001 | 0.000 | 0.016 | 0.025 |
| 0.007         | 0.000     | 0.000 | 0.006 | 0.008 | 0.015 | 0.005 |
| 0.000         | 0.000     | 0.000 | 0.061 | 0.019 | 0.014 | 0.001 |
| 0.006         | 0.000     | 0.000 | 0.026 | 0.010 | 0.009 | 0.002 |
| 0.004         | 0.057     | 0.002 | 0.725 | 0.515 | 0.065 | 0.054 |
| 0.000         | 0.016     | 0.000 | 0.701 | 0.347 | 0.243 | 0.023 |
| 0.016         | 0.000     | 0.000 | 0.019 | 0.008 | 0.014 | 0.003 |
| 0.000         | 0.000     | 0.000 | 0.046 | 0.010 | 0.009 | 0.001 |
| 0.701         | 0.019     | 0.046 | 0.000 | 0.000 | 0.000 | 0.042 |
| 0.347         | 0.008     | 0.010 | 0.000 | 0.000 | 0.000 | 0.065 |
| 0.243         | 0.014     | 0.009 | 0.000 | 0.000 | 0.000 | 0.001 |
| 0.023         | 0.003     | 0.001 | 0.042 | 0.065 | 0.001 | 0.000 |
| 0.246         | 0.000     | 0.002 | 0.000 | 0.000 | 0.000 | 0.004 |
| 0.547         | 0.561     | 0.797 | 0.058 | 0.915 | 0.157 | 0.100 |
| 0.746         | 0.345     | 0.436 | 0.080 | 0.001 | 0.004 | 0.163 |
| 0.830         | 0.932     | 0.873 | 0.128 | 0.114 | 0.356 | 0.147 |
| 0.874         | 0.845     | 0.977 | 0.008 | 0.002 | 0.366 | 0.083 |
| 0.641         | 0.021     | 0.069 | 0.004 | 0.003 | 0.001 | 0.002 |
| 0.621         | 0.212     | 0.440 | 0.001 | 0.105 | 0.004 | 0.053 |
| 0.766         | 0.543     | 0.659 | 0.441 | 0.062 | 0.050 | 0.042 |
| 0.937         | 0.908     | 0.927 | 0.143 | 0.012 | 0.822 | 0.274 |
| 0.697         | 0.836     | 0.945 | 0.027 | 0.050 | 0.871 | 0.096 |
| 0.594         | 0.021     | 0.077 | 0.136 | 0.221 | 0.044 | 0.001 |

| MgU   | NUtE  | PUtE  | KUtE  | CaUtE | MgUtE | NHI   |
|-------|-------|-------|-------|-------|-------|-------|
| 0.000 | 0.009 | 0.001 | 0.508 | 0.571 | 0.000 | 0.000 |
| 0.967 | 0.000 | 0.020 | 0.000 | 0.000 | 0.007 | 0.000 |
| 0.000 | 0.882 | 0.100 | 0.052 | 0.057 | 0.013 | 0.189 |
| 0.002 | 0.001 | 0.151 | 0.249 | 0.064 | 0.024 | 0.000 |
| 0.656 | 0.291 | 0.528 | 0.614 | 0.815 | 0.632 | 0.347 |
| 0.000 | 0.894 | 0.000 | 0.670 | 0.148 | 0.001 | 0.209 |
| 0.014 | 0.325 | 0.250 | 0.015 | 0.187 | 0.013 | 0.044 |
| 0.001 | 0.266 | 0.004 | 0.226 | 0.002 | 0.012 | 0.006 |
| 0.000 | 0.510 | 0.008 | 0.131 | 0.129 | 0.000 | 0.083 |
| 0.001 | 0.780 | 0.724 | 0.470 | 0.369 | 0.050 | 0.326 |
| 0.004 | 0.867 | 0.603 | 0.887 | 0.967 | 0.093 | 0.519 |
| 0.001 | 0.651 | 0.431 | 0.927 | 0.908 | 0.052 | 0.310 |
| 0.792 | 0.610 | 0.599 | 0.321 | 0.696 | 0.337 | 0.439 |
| 0.246 | 0.547 | 0.746 | 0.830 | 0.874 | 0.641 | 0.621 |
| 0.000 | 0.561 | 0.345 | 0.932 | 0.845 | 0.021 | 0.212 |
| 0.002 | 0.797 | 0.436 | 0.873 | 0.977 | 0.069 | 0.440 |
| 0.000 | 0.058 | 0.080 | 0.128 | 0.008 | 0.004 | 0.001 |
| 0.000 | 0.915 | 0.001 | 0.114 | 0.002 | 0.003 | 0.105 |
| 0.000 | 0.157 | 0.004 | 0.356 | 0.366 | 0.001 | 0.004 |
| 0.004 | 0.100 | 0.163 | 0.147 | 0.083 | 0.002 | 0.053 |
| 0.000 | 0.199 | 0.001 | 0.380 | 0.111 | 0.000 | 0.005 |
| 0.199 | 0.000 | 0.016 | 0.003 | 0.014 | 0.001 | 0.000 |
| 0.001 | 0.016 | 0.000 | 0.088 | 0.736 | 0.000 | 0.001 |
| 0.380 | 0.003 | 0.088 | 0.000 | 0.000 | 0.175 | 0.060 |
| 0.111 | 0.014 | 0.736 | 0.000 | 0.000 | 0.436 | 0.351 |
| 0.000 | 0.001 | 0.000 | 0.175 | 0.436 | 0.000 | 0.000 |
| 0.005 | 0.000 | 0.001 | 0.060 | 0.351 | 0.000 | 0.000 |
| 0.020 | 0.003 | 0.000 | 0.009 | 0.067 | 0.000 | 0.001 |
| 0.262 | 0.001 | 0.577 | 0.000 | 0.000 | 0.365 | 0.051 |
| 0.296 | 0.228 | 0.860 | 0.000 | 0.000 | 0.616 | 0.928 |
| 0.001 | 0.000 | 0.001 | 0.029 | 0.022 | 0.000 | 0.000 |

| PHI   | KHI   | CaHI  | MgHI  |
|-------|-------|-------|-------|
| 0.007 | 0.682 | 0.781 | 0.000 |
| 0.000 | 0.000 | 0.001 | 0.000 |
| 0.309 | 0.082 | 0.144 | 0.117 |
| 0.477 | 0.403 | 0.010 | 0.168 |
| 0.327 | 0.729 | 0.980 | 0.693 |
| 0.000 | 0.086 | 0.406 | 0.071 |
| 0.240 | 0.065 | 0.088 | 0.039 |
| 0.167 | 0.192 | 0.009 | 0.312 |
| 0.037 | 0.085 | 0.243 | 0.001 |
| 0.960 | 0.484 | 0.448 | 0.071 |
| 0.838 | 0.940 | 0.960 | 0.097 |
| 0.705 | 0.949 | 0.926 | 0.060 |
| 0.265 | 0.800 | 0.601 | 0.213 |
| 0.766 | 0.937 | 0.697 | 0.594 |
| 0.543 | 0.908 | 0.836 | 0.021 |
| 0.659 | 0.927 | 0.945 | 0.077 |
| 0.441 | 0.143 | 0.027 | 0.136 |
| 0.062 | 0.012 | 0.050 | 0.221 |
| 0.050 | 0.822 | 0.871 | 0.044 |
| 0.042 | 0.274 | 0.096 | 0.001 |
| 0.020 | 0.262 | 0.296 | 0.001 |
| 0.003 | 0.001 | 0.228 | 0.000 |
| 0.000 | 0.577 | 0.860 | 0.001 |
| 0.009 | 0.000 | 0.000 | 0.029 |
| 0.067 | 0.000 | 0.000 | 0.022 |
| 0.000 | 0.365 | 0.616 | 0.000 |
| 0.001 | 0.051 | 0.928 | 0.000 |
| 0.000 | 0.103 | 0.125 | 0.000 |
| 0.103 | 0.000 | 0.000 | 0.033 |
| 0.125 | 0.000 | 0.000 | 0.094 |
| 0.000 | 0.033 | 0.094 | 0.000 |
